# Supplementary material
Source: PubMed Central journal article supplement (PMC3646656)

1 **Supplementary Information**

2

3 Genome-Wide Association Identifies Diverse Causes of Common Variable

4 Immunodeficiency

5

6 Jordan S. Orange, Joseph T. Glessner, Elena Resnick, Kathleen E. Sullivan, Mary Lucas,

7 Berne Ferry, Cecilia E. Kim, Cuiping Hou, Fengxiang Wang, Rosetta Chiavacci, Subra

8 Kugathasan, John W. Sleasman, Robert Baldassano, Elena E. Perez, Helen Chapel,

9 Charlotte Cunningham-Rundles, Hakon Hakonarson

10

11

## 12 **Supplementary Method**

13

14 Support Vector Machine Method for Possible Prediction of CVID Status and

15 Development of Complications based on a Targeted SNP Panel

16

17 A Support Vector Machine (SVM) is a decision-based prediction algorithm which can

18 classify data into several groups. SVM is based on training data mapped to a higher

19 dimensional space and separated by a plane defining the two classes of data, followed by

20 a testing stage where status is predicted based on the model and compared to known

21 status to test the accuracy (1). The implementation of SVM used is LIBSVM software

22 (2,3). Genome-wide SNP microarrays provide 610,000 genotypes which tag the genome

23 in an unbiased way without need for prior hypothesis concerning candidate genes.

24 Classical genome-wide association methods evaluate single SNP significance for

25 difference in allele frequency. Although successful, the reality that many common

26 complex diseases are polygenic in etiology with epistasis of multiple gene combinations

27 makes an integrative model utilizing more of the data content more incisive. The

28 application of SVM to genome-wide SNP data provides a robust framework for clinical

29 disease prediction to evaluate risk and enact preventative measures, as we have

30 demonstrated previously for type 1 diabetes (4).

31

32 There are two components to the data: the target value which is the classification of the

33 subject and the corresponding attributes which are more granular characteristics. In the

34 application to CVID, we sought to predict target Values (Class Labels): CVID (yes/no),

35 Bronchiectasis (yes/no), and OSAI (yes/no). This prediction is based on the attributes  
36 (features or observed variables): Genotypes for the top 1,000 SNPs previously identified  
37 from case:control genome-wide association (top 0.16% of original data set and all  
38  $P < 0.0015$ ).

39

40 Phenotype labels were scaled to +1 for affected and -1 for unaffected. Genotype data is  
41 scaled with AA=0, AB=0.5 and BB=1. Data is mapped to high dimensional space by the  
42 LIBSVM algorithm to differentiate populations (2,3). Iterations of a coarse grid are  
43 followed by finer grids to avoid excessive time expenditure of complete grid search. The  
44 SVM is based principally on two variables: cost  $C$  (the penalty parameter of SVMs) and  
45  $\gamma = 1/\text{number of variables}$ . The SVM type in our application was C-SVM classification  
46 which runs through iterations of minimizing error functions while maintaining a  
47 hyperplane with maximum margin to avoid overfitting. The kernel function maps  
48 attribute data into a higher dimensional space to improve distinguishing characteristics.  
49 The kernel type in this application was a radial basis function (RBF) which is based on  
50 distance from an origin. Once the SVM model is established through training and  
51 validated for accuracy with an independent dataset in testing, additional data can be  
52 mapped and prediction made based on the model.

53

54 Support vector machines (SVM) approach is a machine learning approach that can map  
55 combinations of genotypes in high dimensional space. The top 1000 significant SNPs  
56 from the discovery case:control genotype association studies we used as observed  
57 characteristics to form a designation decision between CVID (common variable

58 immunodeficiency) case and an individual not affected by CVID. The dataset available  
59 was separated into a training set of 179 cases and 1,917 controls which the SVM model is  
60 based on. In this training set, the case/control label and genotype attributes guide model  
61 formation. In the testing set of independent 109 cases and 1,114 controls, only the  
62 genotype attributes are supplied to the model established during training which then  
63 distinguishes cases or controls based on the genotype profile. The simple diagnostic yes  
64 or no question is: based on this person's genotypes do they have CVID? The prediction  
65 accuracy turned out well: positive predictive value and negative predictive value of 1.0  
66 and 0.957, respectively.

67

68 To demonstrate poor model accuracy based on the same SVM methods, we ran the  
69 training stage with randomized testing data. The Bronchiectasis model applied to random  
70 affected labels and random genotypes resulted in a prediction accuracy of 27.1%. The  
71 Bronchiectasis model applied to random affected labels and correct genotypes resulted in  
72 a prediction accuracy of 77.1%. The OSAI model applied to random affected labels and  
73 correct genotypes resulted in a prediction accuracy of 67.7%. Given these markedly  
74 poorer accuracy results from randomized data compared to our observed data bolsters  
75 confidence that our high success rate is less likely due to a confounding factor, bias, or  
76 error. Regardless of assurances based on the modeling success rate these results should be  
77 taken as preliminary and will require additional data to reach ultimate application in  
78 clinical settings.

79

80

81 Supplement References:

- 82 1. V. Vapnik. The Nature of Statistical Learning Theory. Springer-Verlag, New York,  
83 NY, 1995.
- 84 2. Chih-Chung Chang and Chih-Jen Lin, LIBSVM : a library for support vector  
85 machines, 2001. Software available at <http://www.csie.ntu.edu.tw/~cjlin/libsvm>
- 86 3. C. W. Hsu, C. C. Chang, C. J. Lin. A practical guide to support vector classification,  
87 2003.
- 88 4. Wei Z, Wang K, Qu HQ, Zhang H, Bradfield J, Kim C, Frackleton E, Hou C, Glessner  
89 JT, Chiavacci R, Stanley C, Monos D, Grant SF, Polychronakos C, Hakonarson H. From  
90 disease association to risk assessment: an optimistic view from genome-wide association  
91 studies on type 1 diabetes. PLoS Genet. 2009 Oct;5(10):e1000678. Epub 2009 Oct 9.  
92  
93  
94

**Supplemental Tables**

Genome-Wide Association Identifies Diverse Causes of Common Variable Immunodeficiency

Jordan S. Orange, Joseph T. Glessner, Elena Resnick, Kathleen E. Sullivan, Mary Lucas, Berne Ferry, Cecilia E. Kim, Cuiping Hou, Fengxiang Wang, Rosetta Chiavacci, Subra Kugathasan, John W. Sleasman, Robert Baldassano, Elena E. Perez, Helen Chapel, Charlotte Cunningham-Rundles, Hakon Hakonarson

**Supplementary Table 1: CVID Subphenotypes and Sample Sizes**

| CVID Subphenotype    | Cases | Controls |
|----------------------|-------|----------|
| Cancer               | 13    | 249      |
| Lymphoma             | 9     | 253      |
| Lymphadenopathy      | 30    | 232      |
| NRH                  | 13    | 249      |
| LIP                  | 10    | 252      |
| Bronchiectasis       | 78    | 184      |
| Granuloma            | 34    | 228      |
| GIEnteropathy        | 19    | 243      |
| Malabsorption        | 13    | 249      |
| Splenectomy          | 40    | 222      |
| Cytopenias           | 27    | 235      |
| OSAI                 | 75    | 187      |
| Low IgM (<50 mg/dL)  | 206   | 56       |
| Low IgA (<10 mg/dL)  | 160   | 102      |
| CD19 (<1%)           | 11    | 251      |
| AgeOnsetSx (<10 yrs) | 42    | 220      |

**Supplementary Table 2. CVID Patients with GI Enteropathy vs CVID Patients without Genotype Association Replication in IBD Based on Single SNP Significance**

| SNP        | Gene             | Distance | P_CVID+GIEnteropathy(IBD) | Allele1 | F_A    | F_U    | OR   | P_IBD   | Allele1 | F_A    | F_U    | OR     |
|------------|------------------|----------|---------------------------|---------|--------|--------|------|---------|---------|--------|--------|--------|
| rs6532122  | <i>GPRIN3</i>    | 3497     | 0.001204                  | A       | 0.2632 | 0.0947 | 3.42 | 9.90E-8 | A       | 0.0786 | 0.1072 | 0.7109 |
| rs17041264 | <i>COLQ</i>      | 196      | 0.000368                  | T       | 0.1579 | 0.0350 | 5.17 | 3.15E-6 | T       | 0.0049 | 0.0135 | 0.3608 |
| rs12889533 | <i>C14orf143</i> | 19903    | 0.000561                  | T       | 0.1316 | 0.4156 | 0.21 | 1.28E-4 | T       | 0.3563 | 0.3878 | 0.8736 |

rs12889533 replicates with allele frequency in the same direction while rs6532122 and rs17041264 are significant in the opposite direction of allele frequency.



**Supplementary Table 3: Large Genic CNVs Impacting Single CVID Cases not Observed in Controls**

**A) Deletions Impacting Immune Genes**

| CNVR Del Singleton       | Count SNPs | Distance From Exon | Gene                                                                                                                                                                                                                                                                                                                                                                                                                                                                                                                                                                                                                                                                                                                                                                                                                                                                                                                                                          |
|--------------------------|------------|--------------------|---------------------------------------------------------------------------------------------------------------------------------------------------------------------------------------------------------------------------------------------------------------------------------------------------------------------------------------------------------------------------------------------------------------------------------------------------------------------------------------------------------------------------------------------------------------------------------------------------------------------------------------------------------------------------------------------------------------------------------------------------------------------------------------------------------------------------------------------------------------------------------------------------------------------------------------------------------------|
| chr4:86650109-87684765   | 209        | 0                  | ARHGAP24,BC038746, <b>MAPK10</b>                                                                                                                                                                                                                                                                                                                                                                                                                                                                                                                                                                                                                                                                                                                                                                                                                                                                                                                              |
| chr16:75457204-76988778  | 78         | 0                  | ADAMTS18,AK026469,BC035731,CLEC3A,KIAA1576,MON1B, <b>WWOX</b>                                                                                                                                                                                                                                                                                                                                                                                                                                                                                                                                                                                                                                                                                                                                                                                                                                                                                                 |
| chr3:74573112-74866049   | 66         | 0                  | <b>CNTN3</b>                                                                                                                                                                                                                                                                                                                                                                                                                                                                                                                                                                                                                                                                                                                                                                                                                                                                                                                                                  |
| chr19:56625454-56761712  | 64         | 0                  | LOC729767, <b>SIGLEC12,SIGLEC6,SIGLEC8</b>                                                                                                                                                                                                                                                                                                                                                                                                                                                                                                                                                                                                                                                                                                                                                                                                                                                                                                                    |
| chr4:103671292-104700248 | 51         | 0                  | AK093356,BDH2,CENPE,CENPE variant protein,CR604221,LOC133308,MANBA, <b>NFKB1</b> ,NHEDC1,UBE2D3,UNQ6308,ZCD2                                                                                                                                                                                                                                                                                                                                                                                                                                                                                                                                                                                                                                                                                                                                                                                                                                                  |
| chr14:43997374-46152755  | 45         | 0                  | AX748292,BC038722,C14orf106,C14orf155,C14orf28,FANCM, <b>FKBP3</b> ,KIAA0423,KLHL28,PRPF39                                                                                                                                                                                                                                                                                                                                                                                                                                                                                                                                                                                                                                                                                                                                                                                                                                                                    |
| chr6:29844580-30045812   | 44         | 0                  | AK097625,BC035647, <b>HLA-A,HLA-A*0226,HLA-G,HLA-G2.2</b> ,LOC554223,LOC642032,NR_001317,NR_001318,NR_002139                                                                                                                                                                                                                                                                                                                                                                                                                                                                                                                                                                                                                                                                                                                                                                                                                                                  |
| chr2:86695685-87945980   | 40         | 0                  | ANAPC1,BC066991, <b>CD8A,CD8B</b> ,DQ576041,LOC285074,MGC4677,PLGLB2,RGPD1,RGPD2,RMND5A,RNF103                                                                                                                                                                                                                                                                                                                                                                                                                                                                                                                                                                                                                                                                                                                                                                                                                                                                |
| chr6:22380732-22525808   | 40         | 0                  | <b>PRL</b>                                                                                                                                                                                                                                                                                                                                                                                                                                                                                                                                                                                                                                                                                                                                                                                                                                                                                                                                                    |
| chr6:31465923-33432505   | 34         | 0                  | AF075059, <b>AGER</b> ,AGPAT1, <b>AIF1</b> ,AK057104,AL050203,APOM,ATP6V1G2,B3GALT4, <b>BAT1,BAT2,BAT3,BAT4,BAT5,BF,BRD2,BTNL2,C2,C4A</b> ,C4A variant protein,C6orf10, <b>C6orf21,C6orf25</b> ,C6orf26,C6orf27,C6orf31,C6orf47,C6orf48, <b>CFB</b> ,CLIC1,COL11A2,CREBL1,CS266662,CSNK2B,CYP21A2, <b>DAXX</b> ,DDAH2,DKFZp313H139,DKFZp547I194, <b>DKFZp779M0311</b> ,DOM3Z,EGFL8,EHMT2, <b>FKBP1</b> ,G18.1a,G6E,G6e,G7c,G8,GPSM3,HCP5, <b>HLA-DMA,HLA-DMB,HLA-DOA,HLA-DOB,HLA-DPA1,HLA-DPB1,HLA-DPB2,HLA-DQA1,HLA-DQA2,HLA-DQB1,HLA-DQB2,HLA-DRA,HLA-DRB1,HLA-DRB5,HSD17B8,HSPA1A,HSPA1B,HSPA1L,LOC401252,LSM2,LST1,LTA,LTB,LY6G5B,LY6G5C,LY6G6C,LY6G6D,MCCD1,MEGT1,MICA,MICB,MSH5,NCR3,NEU1,NFKBIL1,NG36/G9a,NOTCH4,NR_002742,NR_002745,NR_002812,NR_002971,NR_003140,PBX2,PFN6,PP199,PPT2,PRRT1,PSMB8,PSMB9,RAGE,RDBP,RGL2,RING1,RNF5,RP,RPS18,RXR8,SKIV2L,SLC39A7,SLC44A4,STK19,<b>TAP1,TAP2,TAPBP,TNF,TNFA</b>,TNXB,VARS,VPS52,WDR46,ZBTB12,ZBTB22</b> |
| chr2:70616413-71523501   | 30         | 0                  | ADD2,AF090102,ANKRD53,ATP6V1B1, <b>CD207</b> ,CLEC4F,FIGLA,KIAA1155,MCEE,MPHOSPH10,N-Acetylglucosamine kinase,NAGK,NP220,OR7E91P,TEX261, <b>TGFA</b> ,VAX2,ZNF638                                                                                                                                                                                                                                                                                                                                                                                                                                                                                                                                                                                                                                                                                                                                                                                             |
| chr8:95257759-96161427   | 28         | 0                  | AF086017,AX747981,C8orf38,CCNE2, <b>CDH17</b> ,DPY19L4,FSBP, <b>GEM</b> ,INTS8,KIAA1429,RAD54B,RBM35A,TP53INP1,p53DINP1                                                                                                                                                                                                                                                                                                                                                                                                                                                                                                                                                                                                                                                                                                                                                                                                                                       |
| chr1:184639488-185615061 | 24         | 0                  | C1orf27,PDC, <b>PLA2G4A,PTGS2</b>                                                                                                                                                                                                                                                                                                                                                                                                                                                                                                                                                                                                                                                                                                                                                                                                                                                                                                                             |
| chr4:124486894-125137357 | 21         | 0                  | AL833449,BC053945, <b>SPRY1</b>                                                                                                                                                                                                                                                                                                                                                                                                                                                                                                                                                                                                                                                                                                                                                                                                                                                                                                                               |
| chr1:226522770-226673588 | 20         | 0                  | <b>KIAA1556,KIAA1639,OBSCN</b> ,TRIM11,TRIM17                                                                                                                                                                                                                                                                                                                                                                                                                                                                                                                                                                                                                                                                                                                                                                                                                                                                                                                 |
| chr21:14806346-14824849  | 17         | 0                  | <b>HACS1,SAMSN1</b>                                                                                                                                                                                                                                                                                                                                                                                                                                                                                                                                                                                                                                                                                                                                                                                                                                                                                                                                           |
| chr7:84542383-84633646   | 16         | 0                  | <b>SEMA3D</b>                                                                                                                                                                                                                                                                                                                                                                                                                                                                                                                                                                                                                                                                                                                                                                                                                                                                                                                                                 |
| chr4:162635366-163113553 | 15         | 0                  | <b>FSTL5</b>                                                                                                                                                                                                                                                                                                                                                                                                                                                                                                                                                                                                                                                                                                                                                                                                                                                                                                                                                  |
| chr19:48834611-49626859  | 15         | 0                  | AK090553,AK098175,AK131520,AX748287,BC041923,BC045755, <b>CADM4</b> ,CR593740,DKFZp564H1322,FLJ12886,HZF19,HZF6, <b>IRGC</b> ,KCNN4,LYPD5, <b>PLAUR</b> ,ZNF155,ZNF221,ZNF222,ZNF223,ZNF224,ZNF225,ZNF226,ZNF227,ZNF228,ZNF229,ZNF230,ZNF233,ZNF234,ZNF235,ZNF284,ZNF285A,ZNF404,ZNF45                                                                                                                                                                                                                                                                                                                                                                                                                                                                                                                                                                                                                                                                        |
| chr4:90603695-91299621   | 14         | 0                  | AK123890,CR605611,KIAA1680,MGC48628,MMRN1, <b>SNCA</b>                                                                                                                                                                                                                                                                                                                                                                                                                                                                                                                                                                                                                                                                                                                                                                                                                                                                                                        |
| chr6:138020053-138532047 | 14         | 0                  | AK124173,PERP, <b>TNFAIP3</b>                                                                                                                                                                                                                                                                                                                                                                                                                                                                                                                                                                                                                                                                                                                                                                                                                                                                                                                                 |
| chr7:30225447-30798217   | 14         | 0                  | AK096056,AK096687,AK097240,AL137445,BC016976,BC041636,BX648714,C7orf24,CR595731,CRH2R, <b>CRHR2</b> ,FLJ22374,GARS,INMT, <b>NOD1</b> ,NR_002186,ZNRF2                                                                                                                                                                                                                                                                                                                                                                                                                                                                                                                                                                                                                                                                                                                                                                                                         |
| chr12:55685282-          | 14         | 0                  | ARHGAP9,AVIL,B4GALNT1,BC019026,BC033961,BC073932,CDK4,CENTG1,CR625                                                                                                                                                                                                                                                                                                                                                                                                                                                                                                                                                                                                                                                                                                                                                                                                                                                                                            |

|                           |    |   |                                                                                                                                                                                                                                                                               |
|---------------------------|----|---|-------------------------------------------------------------------------------------------------------------------------------------------------------------------------------------------------------------------------------------------------------------------------------|
| 56515644                  |    |   | 050,CS444342,CTDSP2,CYP1,CYP27B1,DCTN2,DDIT3,DTX3,FAM119B,G43318,GEFT,GLI1,INHBC,INHBE,KIAA0286,KIAA1002,KIF5A, <b>LRP1</b> ,MARCH9,MARS,MBD6,ME TTL1,MYO1A,NAB2,NDUFA4L2,NXPH4,OS9,PIP5K2C,R3HDM2,RGL1,SHMT2,SLC26A10,STAC3, <b>STAT6</b> ,TAC3,TSFM,TSPAN31,ZBTB39,ZNEUROK1 |
| chr16:86267434-86992013   | 14 | 0 | AK126852,AX747795,BANP,CA5A,DKFZp434G0522,FLJ00104,JPH3,KLHDC4, <b>SLC7A5</b>                                                                                                                                                                                                 |
| chr2:179266611-179839804  | 13 | 0 | AK123298,CR624402, <b>FLJ39502</b> ,SESTD1, <b>TTN</b>                                                                                                                                                                                                                        |
| chr3:95106214-95125111    | 12 | 0 | <b>PROS1</b>                                                                                                                                                                                                                                                                  |
| chr2:36745429-37640775    | 11 | 0 | AK001814,BC017652,CCDC75,CEBPZ, <b>EIF2AK2</b> ,HEATR5B,KIAA1414,PRKD3,PRO1853,QPCT,STRN,SULT6B1,VIT                                                                                                                                                                          |
| chr4:151504432-151570906  | 11 | 0 | <b>DKFZp686K03100,LRBA</b>                                                                                                                                                                                                                                                    |
| chr11:127094060-128138864 | 11 | 0 | AX747861,BC039676,DKFZp686D0662, <b>ETS1</b> ,FLI1                                                                                                                                                                                                                            |
| chr1:31912222-32647867    | 10 | 0 | AK096192,BAI2,BAI2,BC069257,BC111382,BSDC1,C1orf90,C1orf91,CCDC28B,COL16A1,CR601100,DCDC2B,DKFZp564C2082,DKFZp686B09139,EIF3S2, <b>HDAC1</b> ,IQCC, <b>KHDRBS1</b> ,KPNNA6, <b>LCK</b> ,LOC339483, <b>MARCKSL1</b> ,PTP4A2,SPOCD1,TMEM39B,TSSK3,TXLNA,UNQ548                  |
| chr3:106447305-107177994  | 10 | 0 | <b>ALCAM,CBLB,Nbla00127</b>                                                                                                                                                                                                                                                   |
| chr6:161278798-161959701  | 10 | 0 | AGPAT4,C6orf59,LPAAT-delta,MAP3K4,MTK1, <b>PARK2</b> ,parkin                                                                                                                                                                                                                  |
| chr7:24205709-24955079    | 10 | 0 | DFNA5,ICERE-1,KIAA0704,MPP6, <b>NPY</b> ,OSBPL3                                                                                                                                                                                                                               |

## B) Deletions Not Impacting Immune Genes

|                           | Count SNPs | Distance From Exon | Gene                                                                                                                                     |
|---------------------------|------------|--------------------|------------------------------------------------------------------------------------------------------------------------------------------|
| CNVR Del Singleton        |            |                    |                                                                                                                                          |
| chr3:163785970-165636507  | 94         | 0                  | BC073807,LOC647107                                                                                                                       |
| chr2:78159130-78549747    | 86         | 0                  | BC024248,BC030125                                                                                                                        |
| chr3:7053179-7177909      | 49         | 0                  | GRM7                                                                                                                                     |
| chr11:109142987-110423998 | 48         | 0                  | AK094117,AK124179,ARHGAP20,DKFZp434I0812,FDX1,KIAA1726,NR_001287,RDX                                                                     |
| chr12:27002588-28111983   | 44         | 0                  | AK000807,ARNTL2,BC043511,DKFZp564O1863,FGFR1OP2,KIAA0965,KIAA1230,KLHDC5,LOC728858,MDS023,MRPS35,PPFIBP1,PTHLH,REP15,STK38L,SURB7,TM7SF3 |
| chr6:97170276-97625708    | 39         | 0                  | C6orf66,FHL5,GPR63,KIAA1900,KLHL32                                                                                                       |
| chr6:163188894-163315053  | 35         | 33591              | PACRG                                                                                                                                    |
| chr16:9624870-10467886    | 35         | 0                  | ATF7IP2,DKFZp666E123,DQ587956,DQ595173,GRIN2A,U07199                                                                                     |
| chr7:64220284-64795508    | 34         | 0                  | AK057766,DQ596928,FLJ25037,LOC441242,ZNF92                                                                                               |
| chr5:90035491-90386715    | 33         | 0                  | GPR98,KIAA0686,VLGR1                                                                                                                     |
| chr3:37578530-37705809    | 32         | 0                  | ITGA9                                                                                                                                    |
| chr6:38413748-38630608    | 32         | 0                  | BTBD9                                                                                                                                    |
| chr20:51844911-51931244   | 28         | 0                  | NR_002189                                                                                                                                |
| chr15:57055702-57917444   | 26         | 0                  | BNIP2,CCNB2,DKFZp761D081,FAM81A,GCNT3,GTF2A2,LDHAL6B,MYO1E,RNF111                                                                        |
| chr15:54225066-54550705   | 24         | 0                  | MNS1,TEX9                                                                                                                                |
| chr17:3128134-3194433     | 23         | 0                  | OR3A1,OR3A2,OR3A4                                                                                                                        |
| chr7:7480856-7819889      | 22         | 0                  | AK027125,COL28,COL28A1,FLJ20323,RPA3                                                                                                     |
| chr10:94222227-94754640   | 22         | 0                  | EXOC6,HHEX,IDE,KIF11                                                                                                                     |

|                           |    |       |                                                                                             |
|---------------------------|----|-------|---------------------------------------------------------------------------------------------|
| chr14:91502061-91569101   | 21 | 0     | TRIP11,Trip230                                                                              |
| chr2:42398844-43092929    | 19 | 0     | COX7A2L,EML4,HAAO,KCNG3,MTA3,OXER1                                                          |
| chr14:26535543-27350537   | 19 | 0     | BX538073                                                                                    |
| chr14:92744837-93367366   | 19 | 0     | BTBD7,C14orf130,COX8C,KIAA1409,PRIMA1                                                       |
| chr2:14622841-14924411    | 18 | 0     | AX747684,FAM84A                                                                             |
| chr12:10589522-10635183   | 17 | 0     | KLRA1                                                                                       |
| chr3:99229541-99419735    | 16 | 0     | CR749263,OR5AC2,OR5H1,OR5H14,OR5H15                                                         |
| chr2:132326867-132449751  | 15 | 0     | FLJ41821                                                                                    |
| chr4:9136858-9881191      | 15 | 0     | DKFZp586I2219,DQ581767,DQ583133,DQ584082,DQ585713,DQ589421,DRD5,SLC2A9,WDR1                 |
| chr4:128805691-128920529  | 15 | 0     | INTU,SLC25A31                                                                               |
| chr9:16987947-17478111    | 15 | 0     | C9orf39,RP11-340N12.1                                                                       |
| chr14:59952568-60075378   | 15 | 0     | C14orf39,SIX6                                                                               |
| chr18:5682313-5922670     | 15 | 0     | AF301223,TTMA                                                                               |
| chr19:23304120-23389292   | 15 | 0     | AK022793,BC038574,BC043213,ZNF91                                                            |
| chr12:39980210-40809427   | 14 | 0     | GLT8D3,PDZRN4                                                                               |
| chr19:19759149-20368239   | 14 | 0     | CR593334,CR614976,DKFZp761G18121,FLJ44894,NR_003128,ZNF253,ZNF486,ZNF506,ZNF682,ZNF90,ZNF93 |
| chr2:98228529-98252357    | 13 | 0     | DKFZp434J0326,DKFZp451I0318,MGC26733                                                        |
| chr2:168309981-169429627  | 13 | 0     | AL080192,B3GALT1,BC035245,LASS6,NOSTRIN,STK39                                               |
| chr4:22663503-22803604    | 13 | 0     | CR607430                                                                                    |
| chr5:107695465-109245567  | 13 | 0     | AK021888,BC034788,FBXL17,FER,MAN2A1,PJA2                                                    |
| chr4:20984915-21185852    | 12 | 0     | KCNIP4                                                                                      |
| chr5:178315216-178514465  | 12 | 0     | ADAMTS2,BX648737,CR598488,GRM6,ZNF354C,ZNF454,mGluR6                                        |
| chr17:55759021-56436171   | 12 | 0     | APPBP2,BCAS3,C17orf64,L32131,PPM1D,USP32                                                    |
| chr18:60137564-60597211   | 12 | 0     | BC036306                                                                                    |
| chr5:38305919-38317501    | 11 | 11209 | EGFLAM                                                                                      |
| chr6:12643097-13219417    | 11 | 0     | PHACTR1,RPEL                                                                                |
| chr4:69405358-69494103    | 10 | 0     | TMPRSS11E                                                                                   |
| chr9:40497792-40617437    | 10 | 0     | AK024257                                                                                    |
| chr11:102824056-102856185 | 10 | 0     | DYNC2H1                                                                                     |
| chr11:124360372-124420328 | 10 | 0     | CCDC15                                                                                      |
| chr12:47817725-47931507   | 10 | 0     | TUBA1A,TUBA1B,TUBA1C                                                                        |
| chr14:62671250-62971495   | 10 | 0     | GPHB5,PPP2R5E,RHOJ                                                                          |
| chr15:91046103-91378387   | 10 | 0     | CHD2,DKFZp781D1727,LOC400451                                                                |

### C) Duplications Impacting Immune Genes

| CNVR Dup Singleton        | Count SNPs | Distance From Exon | Gene                                                                                                                                                                                                                                                                                                                                                                                                                                                                                                                                                                                                                                                                                                                                                                                                                                                                                                                                                                                                                                                                                                                                                                                                                                                                                                                                                                                                                                                                                                                                                                                                                                                                                                                                                                                                                                                                                                                                                                                                                                                                |
|---------------------------|------------|--------------------|---------------------------------------------------------------------------------------------------------------------------------------------------------------------------------------------------------------------------------------------------------------------------------------------------------------------------------------------------------------------------------------------------------------------------------------------------------------------------------------------------------------------------------------------------------------------------------------------------------------------------------------------------------------------------------------------------------------------------------------------------------------------------------------------------------------------------------------------------------------------------------------------------------------------------------------------------------------------------------------------------------------------------------------------------------------------------------------------------------------------------------------------------------------------------------------------------------------------------------------------------------------------------------------------------------------------------------------------------------------------------------------------------------------------------------------------------------------------------------------------------------------------------------------------------------------------------------------------------------------------------------------------------------------------------------------------------------------------------------------------------------------------------------------------------------------------------------------------------------------------------------------------------------------------------------------------------------------------------------------------------------------------------------------------------------------------|
| chr19:5773490-12007370    | 827        | 0                  | <b>ACPS5</b> , ACSBG2, ADAMTS10, AF019226, AF075036, AF161365, AK056073, AK097685, AK124717, ALKBH7, ANGPTL4, ANGPTL6, ANKRD25, ANKRD47, AP1M2, ARHGEF18, ASAH3, ATG4D, AX747405, AX747599, AX748210, AY203940, BC007593, BC014506, BC029904, BC033124, BC039523, BC042816, <b>BGR</b> , C19orf39, C19orf45, C19orf52, <b>C19orf59</b> , <b>C3</b> , CAPS, CARM1, <b>CCL25</b> , <b>CD209</b> , CD320, <b>CD70</b> , CDC37, CDKN2D, <b>CLEC4G</b> , <b>CLEC4M</b> , CLPP, CNN1, COL5A3, CR598956, CRB3, CTXN1, DENND1C, DKFZp547H118, DKFZp564K0223, DKFZp564O1762, DKFZp666A071, DKFZp667O2312, DKFZp761J1410, DKFZp761K0816, DNM2, <b>DNMT1</b> , DOCK6, <b>ECSIT</b> , EDG5, EDG8, EIF3S4, <b>ELAVL1</b> , ELAVL3, ELOF1, EMR1, <b>EMR4</b> , <b>EPOR</b> , EVI5L, FBN3, FBXL12, <b>FCER2</b> , FLJ00153, FLJ11286, FLJ12949, FLJ20079, FLJ22184, FLJ25758, <b>FUT3</b> , FUT5, FUT6, GPR108, GTF2F1, HNRPM, HSZF36, <b>ICAM1</b> , <b>ICAM3</b> , <b>ICAM4</b> , <b>ICAM5</b> , <b>ILF3</b> , INSR, KEAP1, KHSRP, KIAA0521, KIAA1395, KIAA1518, KIAA1543, KIAA1588, KIAA1776, KIAA1978, LASS4, LDLR, LOC126075, LOC162993, LOC388503, LOC401898, LOC440508, LOC55908, LPPR2, LRRC8E, <b>MAP2K7</b> , MARCH2, MBD3L1, MBD3L2, MCOLN1, MGC19604, MGC20983, MGC33407, <b>MKK7</b> , MLLT1, MRPL4, <b>MUC16</b> , MYO1F, MYO1F variant protein, NDUFA11, NDUFA7, NRTN, OLFM2, OR1M1, OR2Z1, OR7D2, OR7D4, OR7E24, OR7G1, OR7G2, OR7G3, P2RY11, PCP2, <b>PDE4A</b> , PEX11G, PIN1, PNPLA6, PPNAN, PPNAN-P2RY11, PRAM1, PRKCSH, PSPN, QTRT1, RAB11B, RAB3D, RANBP3, RAVER1, RDH8, <b>RETN</b> , RFX2, RGL3, RPS28, SH2D3A, SLC25A23, SLC25A41, SLC44A2, SMARCA4, SNAPC2, SPC24, STXBP2, TIMM44, <b>TMED1</b> , <b>TNFSF14</b> , <b>TNFSF9</b> , TRAPPC5, TRIP10, TSPAN16, <b>TUBB4</b> , <b>TYK2</b> , UBL5, UNQ2443, UNQ501, <b>VAV1</b> , VMAC, XAB2, YIPF2, ZNF121, ZNF177, ZNF266, ZNF317, ZNF358, ZNF414, ZNF426, ZNF433, ZNF439, ZNF440, ZNF441, ZNF491, ZNF557, ZNF558, ZNF559, ZNF560, ZNF561, ZNF562, ZNF627, ZNF653, ZNF69, ZNF699, ZNF700, ZNF763, pp10122 |
| chr14:92664804-95787550   | 448        | 0                  | AK125038, ASB2, BC016484, BC037859, BC038791, <b>BDKRB2</b> , BTBD7, BX247990, C14orf109, C14orf130, C14orf132, C14orf139, C14orf142, C14orf152, C14orf48, C14orf49, CLMN, COX8C, CR611440, DDX24, <b>DICER1</b> , FAM14A, FAM14B, GIG24, GLRX5, GSC, IFI27, <b>KIAA0928</b> , KIAA1409, KIAA1622, MOAP1, NM_207443, NR_001459, NR_003002, OTUB2, P27, PRIMA1, SERPINA1, SERPINA10, <b>SERPINA11</b> , SERPINA12, SERPINA13, SERPINA3, SERPINA4, <b>SERPINA5</b> , <b>SERPINA6</b> , <b>SERPINA9</b> , <b>TCL1A</b> , TCL1B, TCL6, TCL6a1, TCL6d1, TML1                                                                                                                                                                                                                                                                                                                                                                                                                                                                                                                                                                                                                                                                                                                                                                                                                                                                                                                                                                                                                                                                                                                                                                                                                                                                                                                                                                                                                                                                                                             |
| chr11:7678446-10337351    | 315        | 0                  | <b>ADM</b> , AK000908, AK055772, AK090613, ASCL3, AX747224, BC017787, BC027619, BC068088, BC073899, BCA3, C11orf16, C11orf17, CMT4B2, CR598129, DKFZp451C1317, DKFZp686I18166, EIF3S5, IPO7, KIAA0298, KIAA1766, LMO1, MGC10850, <b>NLRP10</b> , NRIP3, NR_002580, NR_002962, NR_002977, OR10A3, OR10A6, OR5E1P, OR5P2, OR5P3, OVCH2, RAB6IP1, <b>RIC3</b> , RPL27A, SBF2, SCUBE2, ST5, STK33, SWAP70, TMEM41B, TMEM9B, TUB, U80769, WEE1, ZNF143                                                                                                                                                                                                                                                                                                                                                                                                                                                                                                                                                                                                                                                                                                                                                                                                                                                                                                                                                                                                                                                                                                                                                                                                                                                                                                                                                                                                                                                                                                                                                                                                                   |
| chr13:100600344-103567030 | 197        | 0                  | AK093430, AK096424, AK125748, AX747578, <b>BIVM</b> , C13orf27, CR616826, DKFZp434L2319, ERCC5, FGF14, ITGBL1, KDELC1, LOC196541, RP11-430M15.2-003, SLC10A2, TPP2, UNQ1910, VGCNL1                                                                                                                                                                                                                                                                                                                                                                                                                                                                                                                                                                                                                                                                                                                                                                                                                                                                                                                                                                                                                                                                                                                                                                                                                                                                                                                                                                                                                                                                                                                                                                                                                                                                                                                                                                                                                                                                                 |
| chr14:65357663-66177823   | 159        | 0                  | CR594591, <b>GPHN</b> , MGC88374                                                                                                                                                                                                                                                                                                                                                                                                                                                                                                                                                                                                                                                                                                                                                                                                                                                                                                                                                                                                                                                                                                                                                                                                                                                                                                                                                                                                                                                                                                                                                                                                                                                                                                                                                                                                                                                                                                                                                                                                                                    |
| chr4:119628184-120591177  | 158        | 0                  | AK000709, AK024248, AK097701, AK098126, BC035733, BC070391, CEP170L, DQ574659, DQ575011, DQ575856, DQ576410, DQ582480, DQ599872, <b>FABP2</b> , KIAA0755, KIAA1627, LOC401152, MYOZ2, Myopodin, SEC24D, SYNPO2, USP53                                                                                                                                                                                                                                                                                                                                                                                                                                                                                                                                                                                                                                                                                                                                                                                                                                                                                                                                                                                                                                                                                                                                                                                                                                                                                                                                                                                                                                                                                                                                                                                                                                                                                                                                                                                                                                               |
| chr8:106761674-108458326  | 156        | 0                  | ABRA, <b>ANGPT1</b> , CR602836, Nbla00307, OXR1, ZFPM2                                                                                                                                                                                                                                                                                                                                                                                                                                                                                                                                                                                                                                                                                                                                                                                                                                                                                                                                                                                                                                                                                                                                                                                                                                                                                                                                                                                                                                                                                                                                                                                                                                                                                                                                                                                                                                                                                                                                                                                                              |
| chr4:113049611-113759418  | 129        | 0                  | ALPK1, C4orf16, C4orf21, C4orf32, CR590073, DKFZp434C0927, FLJ00302, KIAA1527, LOC91431, NEUROG2, <b>TIFA</b>                                                                                                                                                                                                                                                                                                                                                                                                                                                                                                                                                                                                                                                                                                                                                                                                                                                                                                                                                                                                                                                                                                                                                                                                                                                                                                                                                                                                                                                                                                                                                                                                                                                                                                                                                                                                                                                                                                                                                       |
| chr15:40145534-40608559   | 90         | 0                  | <b>CAPN3</b> , GANC, KIAA0770, PLA2G4D, PLA2G4F, SNAP23, TMEM87A, VPS39, ZFP106                                                                                                                                                                                                                                                                                                                                                                                                                                                                                                                                                                                                                                                                                                                                                                                                                                                                                                                                                                                                                                                                                                                                                                                                                                                                                                                                                                                                                                                                                                                                                                                                                                                                                                                                                                                                                                                                                                                                                                                     |
| chr14:43658461-45064383   | 87         | 0                  | AX748292, BC038722, C14orf106, C14orf155, C14orf28, FANCM, <b>FKBP3</b> , KIAA0423, KLHL28, PRPF39                                                                                                                                                                                                                                                                                                                                                                                                                                                                                                                                                                                                                                                                                                                                                                                                                                                                                                                                                                                                                                                                                                                                                                                                                                                                                                                                                                                                                                                                                                                                                                                                                                                                                                                                                                                                                                                                                                                                                                  |
| chr10:67399581-69536663   | 75         | 0                  | CTNNA3, DNAJC12, HERC4, LRRTM3, <b>MYPN</b> , SIRT1                                                                                                                                                                                                                                                                                                                                                                                                                                                                                                                                                                                                                                                                                                                                                                                                                                                                                                                                                                                                                                                                                                                                                                                                                                                                                                                                                                                                                                                                                                                                                                                                                                                                                                                                                                                                                                                                                                                                                                                                                 |
| chr3:107041527-108030375  | 71         | 0                  | <b>CBLB</b>                                                                                                                                                                                                                                                                                                                                                                                                                                                                                                                                                                                                                                                                                                                                                                                                                                                                                                                                                                                                                                                                                                                                                                                                                                                                                                                                                                                                                                                                                                                                                                                                                                                                                                                                                                                                                                                                                                                                                                                                                                                         |
| chr9:137454076-139460602  | 70         | 0                  | ABCA2, AF161442, AGPAT2, AK023162, AK054908, AK055547, AK090585, AK096249, AK098241, AK128153, AK128864, AL832276, ANAPC2, AX747706, AY952890, BC015688, BC032375, BC034456, BC042667, BC043225, BC061888, BC064596, BC092490, BC101937, BTBD14A, <b>C8G</b> , C9orf116, C9orf139, C9orf140, C9orf142, C9orf163, C9orf167, C9orf75, C9orf86, CAMSAP1, <b>CARD9</b> , CLIC3, COBRA1, CR614579, CR619051, DKFZp434B205, DKFZp564M173, DKFZp762I052, DPP7, EDF1, EGFL7, ENTPD2, ENTPD8, FAM69B, FBXW5, FLJ20433, FLJ45224, FUT7, GBDR1, GLT6D1, GPSM1, GRIN1, HBE269, INPP5E, KCNT1, KIAA0310, KIAA0649, KIAA1062, KIAA1422, KIAA1984, LCN1, LCN10, LCN12, LCN6,                                                                                                                                                                                                                                                                                                                                                                                                                                                                                                                                                                                                                                                                                                                                                                                                                                                                                                                                                                                                                                                                                                                                                                                                                                                                                                                                                                                                       |

|                               |    |   |                                                                                                                                                                                                                                                                                                                                                                                                                                                                                                                                                                                                                                                                                           |
|-------------------------------|----|---|-------------------------------------------------------------------------------------------------------------------------------------------------------------------------------------------------------------------------------------------------------------------------------------------------------------------------------------------------------------------------------------------------------------------------------------------------------------------------------------------------------------------------------------------------------------------------------------------------------------------------------------------------------------------------------------------|
|                               |    |   | LCN8,LCN9,LHX3,LOC389813,LOC389816,LOC401565,LOC441476,LOC728489,MA<br>MDC4,MAN1B1,MGC14327,MGC59937,MGC61598,MRP-<br>S2,MRPS2,NDOR1, <b>NOTCH1</b> ,NOXA1,NPDC1,NPTIic,NR1,NR_002958,NR_002975,O<br>BP2A, <b>PAEP</b> ,PHPT1,PMPCA,PTGDS,QSCN6L1,RNF208,RP11-100C15.2,RP11-<br>413M3.10,SDCCAG3,SLC34A3,SNAPC4,SOHLH1,SSNA1,TMEM141,TRAF2,TUBB2<br>C,UAP1L1,UBADC1,UNQ2492,UNQ2541,UNQ747,hNMDAR1-3b,pp8875,ve-statin                                                                                                                                                                                                                                                                    |
| chr18:73989470-<br>76116152   | 60 | 0 | AK056304,ATP9B,AX746671,BC016878,BC017654,BC040056,BX537710,C18orf22,C<br>TDP1,DKFZp434A042,KCNG2, <b>NFATC1</b> ,PARD6G,PQLC1,SALL3,TXNL4A,ZNF508,hd<br>im1+                                                                                                                                                                                                                                                                                                                                                                                                                                                                                                                             |
| chr9:134048500-<br>135886847  | 54 | 0 | ABO, <b>ADAMTS13</b> ,ADAMTSL2,AJ011378,AK123314,AX748058,BARHL1,C9orf166,C9<br>orf7,C9orf9,C9orf96,C9orf98,CEL,CELL,CR592591,CR593670, <b>DBH</b> ,DDX31,EEF1A1,F<br>LJ46082,GBGT1,GFI1B,GTF3C4,GTF3C5,KIAA1308,LOC389827,NR_002783,NTNG2<br>,OBP2B, <b>RALGDS</b> ,REXO4,RPL7A,SARDH,SETX, <b>SLC2A6</b> ,SURF1,SURF2,SURF4,SU<br>RF5,SURF6,TSC1, <b>TTF1</b> ,UNQ2513,VAV2,XPMC2H, <b>vWF-CP</b>                                                                                                                                                                                                                                                                                       |
| chr1:2182293-3539057          | 50 | 0 | <b>ACTRT2</b> ,AK021767,AK124865,ARHGEF16,BC114358,C1orf93,CR749717,DQ601700<br>,FAM79A,FLJ42875,HES5,MEGF6, <b>MMEL1</b> ,MORN1,PANK4,PEX10,PLCH2,PRDM16,<br>RER1,RP3-395M20.1,RP3-395M20.10,RP4-740C4.2,SKI, <b>TNFRSF14</b> ,WDR8                                                                                                                                                                                                                                                                                                                                                                                                                                                      |
| chr1:245537326-<br>245976637  | 49 | 0 | AB120962,AK130400,BC034303,C1orf150, <b>CIAS1</b> , <b>NLRP3</b> ,OR13G1,OR2B11,OR2C3,<br>OR2G2,OR2G3,OR2W5,OR5AY1,OR6F1,ZNF496                                                                                                                                                                                                                                                                                                                                                                                                                                                                                                                                                           |
| chr14:21582956-<br>21976908   | 47 | 0 | AK093552,AK125397,AV1S3A1T,AV25S1,AV4S1, <b>TCR-<math>\alpha</math></b> , <b>TCRA</b> , <b>TCRAV14.1a</b> , <b>TCRAVN1</b> , <b>TCRD</b> , <b>TRA@V</b> , <b>alpha</b><br><b>immunoglobulin</b> ,av27s1, <b>hADV14S1</b> , <b>hADV23S1</b> , <b>hADV29S1</b> , <b>hADV38S2</b> , <b>hDV102S1</b>                                                                                                                                                                                                                                                                                                                                                                                          |
| chr7:157944418-<br>158676623  | 46 | 0 | AX746826,BC041429,BC042556,FAM62B,KIAA1228,NCAPG2,PTPRN2, <b>VIPR2</b> ,WDR6<br>0                                                                                                                                                                                                                                                                                                                                                                                                                                                                                                                                                                                                         |
| chr19:48498399-<br>48562727   | 46 | 0 | <b>CD177</b>                                                                                                                                                                                                                                                                                                                                                                                                                                                                                                                                                                                                                                                                              |
| chr22:34946081-<br>35041308   | 41 | 0 | <b>APOL1</b> ,APOL2,AX747758, <b>MYH9</b>                                                                                                                                                                                                                                                                                                                                                                                                                                                                                                                                                                                                                                                 |
| chr1:113185538-<br>113437683  | 40 | 0 | AFARP1,AX748125,BC023568,BC037540,BC047723,BX648855, <b>LRIG2</b> , <b>SLC16A1</b>                                                                                                                                                                                                                                                                                                                                                                                                                                                                                                                                                                                                        |
| chr2:187993955-<br>189286647  | 39 | 0 | CALCRL,CED-6,GULP1, <b>TFPI</b>                                                                                                                                                                                                                                                                                                                                                                                                                                                                                                                                                                                                                                                           |
| chr11:382079-1386192          | 38 | 0 | AK094678,AK126635,AP2A2,AX747537,AX748330,BC031953,BC048998,BC066355,<br>BRSK2,C11orf35,CD151,CEND1,CHID1, <b>DEAF1</b> ,DKFZp434K249,DRD4,EFCAB4A,EP<br>S8L2, <b>HRAS</b> , <b>IRF7</b> ,KIAA0899,KIAA1542,LRDD,LRRC56,MG1,MUC<br>5AC, <b>MUC2</b> , <b>MUC5AC</b> ,MUC5B,MUC6,MUCDHL,NR_002585,PDDC1,PEN11B,PKP3,P<br>NPLA2,POLR2L,PTDSS2,RASSF7,RNH1,RPLP2, <b>SCT</b> , <b>SIGIRR</b> ,SLC25A22,TALDO1,T<br>MEM16J,TMEM80, <b>TOLLIP</b> ,TSPAN4, <b>tolliip</b>                                                                                                                                                                                                                      |
| chr12:98815353-<br>99473749   | 37 | 0 | ACTR6,ANKS1B,AX746635,BC048272,BC062763,DEPDC4,DKFZp434M0331,DQ579<br>681,DQ583972,DQ595598,DQ598729,EB-<br>1,GOLGA2L1,KIAA0701, <b>NR1H4</b> , <b>SCYL2</b> , <b>SLC17A8</b> ,hArpX                                                                                                                                                                                                                                                                                                                                                                                                                                                                                                      |
| chr4:7568079-8105372          | 36 | 0 | ABLIM2,AFAP1,AJ431609,BC043614,KIAA1808,LOC389199, <b>SORCS2</b>                                                                                                                                                                                                                                                                                                                                                                                                                                                                                                                                                                                                                          |
| chr14:23995185-<br>24062459   | 30 | 0 | AK056368, <b>CMA1</b>                                                                                                                                                                                                                                                                                                                                                                                                                                                                                                                                                                                                                                                                     |
| chr14:103352857-<br>104756910 | 30 | 0 | <b>ADSS</b> , <b>ADSSL1</b> ,AK057986,AK094143, <b>AKT1</b> ,AX721091,AX746996,BRF, <b>BRF1</b> ,C14orf<br>151,C14orf173,C14orf2,C14orf78,C14orf79,CDCA4,CR602005,DKFZp434N0820,DKF<br>Zp434N178,DKFZp686J02145, <b>GPR132</b> ,JAG2,KIAA0284,KIAA0771,KIF26A,LOC3745<br>69,LOC400258,MGC23270,NUDT14,PLD4,PPP1R13B,SIVA1,TDRD9,TMEM179,UGP<br>P                                                                                                                                                                                                                                                                                                                                          |
| chr17:73662981-<br>73765190   | 23 | 0 | AFMID,BC036810, <b>BIRC5</b> , <b>EPR-1</b> ,SYNGR2,TK1,UNQ464/PRO809,survivin-3B                                                                                                                                                                                                                                                                                                                                                                                                                                                                                                                                                                                                         |
| chr13:45066410-<br>45918722   | 22 | 0 | AK095119,AK124928,C13orf18,CPB2,FLJ32682,KIAA0853, <b>LCP1</b> ,LOC220416,LOC28<br>3514,RP11-139H14.4-001,RP11-351K3.2-001,SPERT,ZC3H13                                                                                                                                                                                                                                                                                                                                                                                                                                                                                                                                                   |
| chr19:46758119-<br>46863746   | 21 | 0 | <b>CEACAM21</b> , <b>CEACAM4</b> ,UNQ3098                                                                                                                                                                                                                                                                                                                                                                                                                                                                                                                                                                                                                                                 |
| chr8:6849317-6889488          | 20 | 0 | AF355799, <b>DEFA3</b>                                                                                                                                                                                                                                                                                                                                                                                                                                                                                                                                                                                                                                                                    |
| chr20:60320976-<br>62223928   | 17 | 0 | AK056267,AK128329,AL137301,ARFGAP1,ARFRP1,AX747649,AY940852,BC002534<br>,BC025345,BC069708,BC127852,BHLHB4,BIRC7,C20orf11,C20orf135,C20orf149,C2<br>0orf151,C20orf166,C20orf195,C20orf20,C20orf58,C20orf59,CABLES2, <b>CHRNA4</b> ,COL2<br>0A1,COL9A3,DIDO1,DNAJC5,EEF1A2,FLJ00084,FLJ00118,FLJ30313,GATA5,GMEB<br>2,HRIHFB2281,KCNQ2,KIAA1088,KIAA1269,KIAA1510, <b>LAMA5</b> , <b>LIME1</b> ,LOC198437,N<br>PBWR2,NR_003244,NR_003245,NTSR1,OATP-E,OGFR,OK/SW-<br>cl.69,OPRL1,PRIC285,PRPF6,PRR17,PTK6,RSF19,RP4-<br>697K14.11,RPS21,RTEL1,SAMD10,SLC2A4RG,SLCO4A1,SOX18,SRMS,STMN3,Si-<br>1-2-<br>19,TCEA2,TCFL5, <b>TNFRSF6B</b> ,TPD52L2,UCKL1,URKL1,YTHDF1,ZBTB46,ZGPAT,ZN<br>F512B |
| chr2:86924985-<br>87026840    | 16 | 0 | <b>CD8B</b> ,RGPD1,RMND5A                                                                                                                                                                                                                                                                                                                                                                                                                                                                                                                                                                                                                                                                 |

|                          |    |   |                                                     |
|--------------------------|----|---|-----------------------------------------------------|
| chr6:128245227-128538250 | 16 | 0 | <b><u>C6orf190,PTPRK</u></b>                        |
| chr1:111628132-111661435 | 15 | 0 | <b><u>CHIA,RP11-165H20.1</u></b>                    |
| chr7:80041654-80110504   | 13 | 0 | <b><u>CD36</u></b>                                  |
| chr12:6085895-6134080    | 11 | 0 | <b><u>VWF</u></b>                                   |
| chr12:17854127-19338878  | 11 | 0 | <b><u>CAPZA3,FLJ22655,PIK3C2G,PLCZ1,PLEKHA5</u></b> |

#### **D) Duplications Not Impacting Immune Genes**

| CNVR Dup Singleton        | Count SNPs | Distance From Exon | Gene                                                                                               |
|---------------------------|------------|--------------------|----------------------------------------------------------------------------------------------------|
| chr8:430424-977192        | 189        | 0                  | <i>AK128400,BC022082,BC038783,C8orf42,DQ584928,ERICH1,LOC389607</i>                                |
| chr10:2682656-3123648     | 157        | 0                  | <i>PFKP</i>                                                                                        |
| chr19:21575835-22802826   | 152        | 0                  | <i>BC030765,CR936832,FKSG70,ZNF100,ZNF208,ZNF257,ZNF43,ZNF492,ZNF676,ZNF99</i>                     |
| chr6:63118894-64091007    | 116        | 0                  | <i>GLULD1,LGS</i>                                                                                  |
| chr2:126935385-127317174  | 98         | 0                  | <i>GYPC</i>                                                                                        |
| chr5:169763949-170518986  | 96         | 0                  | <i>DKFZp666P032,GABRP,KCNIP1,RANBP17</i>                                                           |
| chr6:1977258-2424512      | 92         | 0                  | <i>AJ420566,AK023629,AK091028,CR598484,GMDS</i>                                                    |
| chr1:145196592-145539979  | 65         | 0                  | <i>BC036212,BCL9,CHD1L</i>                                                                         |
| chr3:62813828-63789968    | 63         | 0                  | <i>BC043407,C3orf49,CADPS,FLJ44379,SYNPR</i>                                                       |
| chr5:172824934-173106866  | 62         | 0                  | <i>BC033564,FAM44B</i>                                                                             |
| chr3:83912925-84849961    | 54         | 0                  | <i>BC068246</i>                                                                                    |
| chr11:106523381-106702850 | 54         | 0                  | <i>CWF19L2</i>                                                                                     |
| chr7:50911090-51127086    | 50         | 0                  | <i>COBL</i>                                                                                        |
| chr9:6557841-7007391      | 41         | 0                  | <i>AK098534,BC042976,GLDC,JMJD2C,KIAA0780</i>                                                      |
| chr17:793231-917163       | 40         | 0                  | <i>ABR,NXN,TIMM22</i>                                                                              |
| chr3:148425802-149211699  | 39         | 0                  | <i>AK098763,ZIC1,ZIC4</i>                                                                          |
| chr13:62536330-64097876   | 36         | 0                  | <i>AK057471,AK097490,AK098560,BC128161,NR_002171</i>                                               |
| chr4:92669000-94351161    | 34         | 0                  | <i>GRID2,KIAA1680</i>                                                                              |
| chr3:11041670-11154453    | 33         | 0                  | <i>SLC6A1</i>                                                                                      |
| chr4:141709869-141939520  | 33         | 0                  | <i>TBC1D9</i>                                                                                      |
| chr13:113032851-113140550 | 30         | 0                  | <i>ADPRHL1,GRTP1</i>                                                                               |
| chr2:148947731-149053581  | 29         | 0                  | <i>KIAA1461,MBD5</i>                                                                               |
| chr3:141649121-141911988  | 28         | 0                  | <i>CLSTN2,TRIM42</i>                                                                               |
| chr12:20901315-21459060   | 27         | 0                  | <i>IAPP,LST-3TM12,LST3,SLCO1A2,SLCO1B1,SLCO1B3</i>                                                 |
| chr12:130676799-131128244 | 27         | 0                  | <i>EP400,KIAA1498,KIAA1818,MMP17,NR_002979,PUS1,SFRS8,ULK1</i>                                     |
| chr7:34919485-35862821    | 26         | 0                  | <i>AJ011981,BC049371,BC084560,CR593784,CR595224,DPY19L1,DPY19L2P1,HERPUD2,KIAA0877,SEPT7,TBX20</i> |
| chr1:30940148-31013899    | 25         | 0                  | <i>BC044253,LAPTM5,MATN1</i>                                                                       |
| chr4:63433227-65099386    | 25         | 0                  | <i>SRD5A2L2</i>                                                                                    |

|                          |    |       |                                                                                                                                                                                                           |
|--------------------------|----|-------|-----------------------------------------------------------------------------------------------------------------------------------------------------------------------------------------------------------|
| chr5:12838251-13150705   | 22 | 0     | AY328033                                                                                                                                                                                                  |
| chr6:138653005-138759016 | 22 | 0     | KIAA1244                                                                                                                                                                                                  |
| chr1:103111860-103157198 | 21 | 0     | COL11A1                                                                                                                                                                                                   |
| chr6:34836231-34976532   | 21 | 0     | ANKS1A,C6orf107,SNRPC,TAF11                                                                                                                                                                               |
| chr15:27167056-28188067  | 21 | 0     | APBA2,BC043570,BC070492,BC071630,BC071855,DQ572986,DQ573498,DQ575284,DQ575742,DQ577333,DQ578370,DQ578838,DQ582641,DQ582940,DQ590322,DQ592322,DQ595055,DQ596303,DQ596319,DQ597873,KIAA0574,NDNL2,TJP1,hXIL |
| chr2:3287465-3327227     | 20 | 0     | TSSC1                                                                                                                                                                                                     |
| chr10:98101269-98152781  | 19 | 0     | TLL2,TMEM10                                                                                                                                                                                               |
| chr1:79037280-79973037   | 18 | 0     | ELTD1                                                                                                                                                                                                     |
| chr4:68749536-70089270   | 18 | 0     | AK123556,TMPRSS11B,TMPRSS11E,UGT2A3,UGT2B10,UGT2B15,UGT2B17,UGT2B7,YTHDC1                                                                                                                                 |
| chr2:27584444-28424525   | 17 | 0     | AK124439,BC041993,BC048132,BRE,C2orf16,CCDC121,GCKR,MRPL33,RBKS,SLC4A1AP,SUPT7L,XAB1,ZNF512                                                                                                               |
| chr2:172356838-172528561 | 17 | 0     | HAT1,SLC25A12                                                                                                                                                                                             |
| chr2:180123158-180216026 | 16 | 0     | ZNF533                                                                                                                                                                                                    |
| chr4:15529521-15552238   | 15 | 0     | FGFBP1                                                                                                                                                                                                    |
| chr18:14805527-14905835  | 15 | 0     | ANKRD30B                                                                                                                                                                                                  |
| chr5:1601764-1621442     | 14 | 0     | CR749689                                                                                                                                                                                                  |
| chr10:88722456-89266679  | 14 | 0     | AK091716,BC036645,BC047063,BC065757,BC082979,BC092519,CR609725,CR614919,FAM35A,GLUD1,KIAA1975,KIAA2020,MINPP1                                                                                             |
| chr1:225308870-225407413 | 13 | 0     | CDC42BPA                                                                                                                                                                                                  |
| chr7:74674968-74738702   | 13 | 0     | LOC441257,PMS2L14                                                                                                                                                                                         |
| chr1:193808000-194531039 | 12 | 0     | KCNT2,SLICK                                                                                                                                                                                               |
| chr2:165344115-165435694 | 12 | 0     | COBLL1,KIAA0977                                                                                                                                                                                           |
| chr6:123847128-124726881 | 12 | 0     | TCBA1,TRDN                                                                                                                                                                                                |
| chr16:26961662-26994169  | 12 | 0     | TNT                                                                                                                                                                                                       |
| chr6:102029392-102048325 | 11 | 11862 | GRIK2                                                                                                                                                                                                     |
| chr8:11397047-11414199   | 11 | 0     | BLK                                                                                                                                                                                                       |
| chr8:27689983-27745887   | 11 | 0     | ESCO2,PBK                                                                                                                                                                                                 |
| chr2:77709215-78761206   | 10 | 0     | BC024248,BC030125                                                                                                                                                                                         |
| chr11:5444172-5454375    | 10 | 11939 | HBE1,HBG2,OR51B5                                                                                                                                                                                          |
| chr11:19571323-19595111  | 10 | 96377 | NAV2                                                                                                                                                                                                      |
| chr18:68553733-69070964  | 10 | 0     | BC013370,BC034583,NETO1                                                                                                                                                                                   |
| chr19:34552727-34574348  | 10 | 0     | AK094793                                                                                                                                                                                                  |
| chr4:2059850-2960297     | 10 | 0     | AB000464,AB000465,AB000466,ADD1,AK054619,BC010180,BC032331,C4orf10,C4orf15,C4orf8,CR622423,GRK4,KIAA1643,MXD4,Mad4,NOL14,POLN,RNF4,SH3BP2,ETRAN,TNIP2,ZFYVE28                                             |

**Supplementary Table 4. Homozygous Deletions Observed Exclusive to Cases**

| CNVR                     | Cases Loss | Gene                   | Distance | Distance From Exon |
|--------------------------|------------|------------------------|----------|--------------------|
| chr3:100430538-100430538 | 2          | <i>CLCP1,DCBLD2</i>    | 327315   | 327315             |
| chr2:118777060-118778863 | 1          | <i>INSIG2</i>          | 192993   | 192993             |
| chr3:146130742-146141275 | 1          | <i>DQ595575</i>        | 883692   | 883692             |
| chr5:29455914-29488308   | 1          | <i>AK098570</i>        | 247692   | 247692             |
| chr5:141998044-142000692 | 1          | <b><u>FGF1</u></b>     | 0        | 16953              |
| chr6:32525108-32530999   | 1          | <b><u>HLA-DRA</u></b>  | 4306     | 4306               |
| chr6:62122152-62144592   | 1          | <i>G43499</i>          | 251536   | 251536             |
| chr6:77159914-77159914   | 1          | <i>IMPG1</i>           | 320859   | 320859             |
| chr6:128018101-128024702 | 1          | <b><u>C6orf190</u></b> | 46336    | 46336              |
| chr12:17277311-17282429  | 1          | <i>LMO3,Nbla03267</i>  | 625020   | 625020             |



**Supplementary Table 5. Genome Global CNV Burden**

| <b>Significant Including Common CNV Exonic</b>              |                                        |                                |                                           |                                   |          |          |
|-------------------------------------------------------------|----------------------------------------|--------------------------------|-------------------------------------------|-----------------------------------|----------|----------|
|                                                             | Locus Exonic Significant Case Enriched | Locus Non-Exonic Case Enriched | Locus Exonic Significant Control Enriched | Locus Non-Exonic Control Enriched | P        | DifFreq  |
| Deletion                                                    | 21                                     | 61                             | 8                                         | 67                                | 0.022628 | 0.149431 |
| Duplication                                                 | 43                                     | 173                            | 12                                        | 12                                | 0.003336 | -0.30093 |
|                                                             |                                        |                                |                                           |                                   |          |          |
| <b>Rare CNV Exonic</b>                                      |                                        |                                |                                           |                                   |          |          |
|                                                             | Case CNV Calls Exonic                  | Case CNV Calls Non-Exonic      | Control CNV Calls Exonic                  | Control CNV Calls Non-Exonic      | P        | DifFreq  |
| Deletion                                                    | 527                                    | 1149                           | 3970                                      | 10290                             | 0.002138 | 0.036038 |
| Duplication                                                 | 813                                    | 1785                           | 5539                                      | 5997                              | 2.45E-55 | -0.16722 |
|                                                             |                                        |                                |                                           |                                   |          |          |
| <b>Rare CNV &gt;100KB Exonic</b>                            |                                        |                                |                                           |                                   |          |          |
|                                                             | Case CNV Calls Exonic                  | Case CNV Calls Non-Exonic      | Control CNV Calls Exonic                  | Control CNV Calls Non-Exonic      | P        | DifFreq  |
| Deletion                                                    | 136                                    | 83                             | 1012                                      | 653                               | 0.768312 | 0.013197 |
| Duplication                                                 | 278                                    | 146                            | 2263                                      | 546                               | 2.46E-11 | -0.14996 |
|                                                             |                                        |                                |                                           |                                   |          |          |
| <b>Samples w Rare CNV &gt;100KB (Impacting gene or not)</b> |                                        |                                |                                           |                                   |          |          |
|                                                             | Case with large rare CNV               | Case without large rare CNV    | Control with large rare CNV               | Control without large rare CNV    | P        | DifFreq  |
| Deletion                                                    | 131                                    | 180                            | 1156                                      | 1610                              | 0.951669 | 0.00329  |
| Duplication                                                 | 186                                    | 125                            | 1391                                      | 1375                              | 0.001504 | 0.095178 |

**Supplementary Table 6. TACI Protein TNFRSF13B Gene Amino Acid Variant and Corresponding nsSNP rs ID**

| nsSNP      | DNA position      | Alleles | AA Change           | Clinical Report (bold-in reports) |
|------------|-------------------|---------|---------------------|-----------------------------------|
| rs34562254 | 16783716          | C/T     | P (CCC) --> L (CTC) | P251L                             |
| rs72553886 | 16783732          | G/T     | V (GTC) --> F (TTC) | V246F                             |
| rs56063729 | 16783809          | A/G     | V (GTG) --> A (GCG) | <b>V220A</b>                      |
| rs56248318 | 16784408          | A/C     | Q (CAG) --> H (CAT) | Q196H                             |
| rs72553885 | 16784417          | A/C     | C (TGC) --> * (TGA) | C193X                             |
| rs72553883 | 16784454          | A/C     | A (GCG) --> E (GAG) | <b>A181E</b>                      |
| rs72553882 | 16784504          | A/C     | Y (TAC) --> * (TAA) | Y164X                             |
| rs72553881 | 16784541          | A/G     | G (GGG) --> E (GAG) | G152E                             |
| rs72553880 | 16792777          | A/G     | A (GCT) --> T (ACT) | A149T                             |
| rs72553879 | 16792911          | A/G     | C (TGT) --> Y (TAT) | C104Y                             |
| rs34557412 | 16792912          | C/T     | C (TGT) --> R (CGT) | <b>C104R</b>                      |
| rs72553877 | 16792962          | A/T     | I (ATC) --> N (AAC) | I87N                              |
| rs72553876 | 16792986          | A/G     | Y (TAT) --> C (TGT) | Y79C                              |
| rs55916807 | 16793007          | C/T     | R (CGC) --> H (CAC) | <b>R72H</b>                       |
| rs67951770 | 16796563          | C/G     | D (GAT) --> H (CAT) | D41H                              |
| rs67951769 | 16796563          | -/G     | frameshift          | D41fx                             |
| rs72553874 | 16796566          | C/T     | W (TGG) --> R (CGG) | W40R                              |
| rs72553884 | 16784425-16784424 | -/G     | frameshift          | D191G                             |
| rs72553878 | 16792925-16792924 | -/T     | frameshift          | Q99H                              |
| rs34182967 | 16793004-16793003 | -/C     | frameshift          | K73R                              |
| rs72553875 | 16793018-16793017 | -/A     | frameshift          | S68S                              |

**Supplementary Table 7. Most Significant Associated Regions Based on Genotype Association**

| Region Genomic Span       | Gene                                        | Count SNPs Top 1000 | Distance From Exon | BestP    | BestSNP    | Allele | F_A    | F_U    | P Replication (Discovery SNP) | F_A Replication (Discovery SNP) | F_U Replication (Discovery SNP) | BestP Replication | BestSNP Replication | F_A Replication | F_U Replication |
|---------------------------|---------------------------------------------|---------------------|--------------------|----------|------------|--------|--------|--------|-------------------------------|---------------------------------|---------------------------------|-------------------|---------------------|-----------------|-----------------|
| chr6:27236785-32521295    | <b><u>MHC</u></b>                           | 110                 | 0                  | 8.62E-10 | rs3117426  | T      | 0.3268 | 0.1907 | 0.3634                        | 0.1697                          | 0.1468                          | <b>0.0004</b>     | rs2156875           | 0.5734          | 0.4475          |
| chr8:23746576-24681608    | <b><u>ADAM28, ADAM7, ADAMDEC1, STC1</u></b> | 4                   | 0                  | 6.24E-6  | rs4872262  | A      | 0.0391 | 0.0107 | <b>0.03135</b>                | 0.0321                          | 0.01346                         | <b>0.0314</b>     | rs4872262           | 0.0321          | 0.0135          |
| chr4:189671181-189676119  | AK095968                                    | 2                   | 18764              | 1.78E-5  | rs1606234  | T      | 0.2961 | 0.4124 | 0.4646                        | 0.4266                          | 0.4524                          | 0.4646            | rs1606234           | 0.4266          | 0.4524          |
| chr10:73083830-73084583   | CDH23                                       | 2                   | 7287               | 2.45E-5  | rs7087554  | A      | 0.5894 | 0.4729 | 0.4591                        | 0.5092                          | 0.4829                          | 0.4591            | rs7087554           | 0.5092          | 0.4829          |
| chr7:4270929-4287047      | <b><u>SDK1</u></b>                          | 5                   | 0                  | 4.70E-5  | rs895710   | T      | 0.2905 | 0.4003 | 0.4551                        | 0.3578                          | 0.3835                          | <b>0.0235</b>     | rs4720301           | 0.3991          | 0.4793          |
| chr1:20369369-20490791    | <b><u>FLJ32784, UBXN10</u></b>              | 7                   | 0                  | 9.09E-5  | rs7514144  | C      | 0.2654 | 0.1808 | 0.3018                        | 0.1560                          | 0.1311                          | <b>2.25E-8</b>    | rs6426636           | 0.4679          | 0.2857          |
| chr10:27709830-27728115   | PTCHD3                                      | 7                   | 0                  | 9.77E-5  | rs5066659  | T      | 0.4022 | 0.3026 | 0.9879                        | 0.2798                          | 0.2793                          | 0.6291            | rs493965            | 0.2844          | 0.3001          |
| chr1:59987116-59993733    | FGGY                                        | 2                   | 2458               | 1.52E-4  | rs11207520 | G      | 0.3994 | 0.3026 | <b>0.00148</b>                | 0.2569                          | 0.1706                          | <b>0.0015</b>     | rs11207520          | 0.2569          | 0.1706          |
| chr12:80435676-80444630   | PPFIA2                                      | 2                   | 59900              | 1.63E-4  | rs2400955  | T      | 0.4134 | 0.3159 | 0.8687                        | 0.3899                          | 0.3842                          | 0.5347            | rs10746192          | 0.4306          | 0.4526          |
| chr11:102069786-102079454 | MMP27                                       | 2                   | 0                  | 1.69E-4  | rs17099394 | T      | 0.1229 | 0.0687 | 0.6947                        | 0.0734                          | 0.06643                         | 0.6947            | rs17099394          | 0.0734          | 0.0664          |
| chr16:71592439-71594134   | ZFXH3                                       | 2                   | 40845              | 1.80E-4  | rs8056528  | C      | 0.3687 | 0.2754 | 0.3698                        | 0.3670                          | 0.3368                          | 0.3698            | rs8056528           | 0.367           | 0.3368          |
| chr8:124729628-124734756  | KLHL38                                      | 4                   | 0                  | 2.05E-4  | rs4871402  | A      | 0.0643 | 0.1325 | 0.7201                        | 0.1009                          | 0.1088                          | 0.3161            | rs7463896           | 0.1697          | 0.1979          |
| chr3:7364204-7369287      | GRM7                                        | 4                   | 40865              | 2.96E-4  | rs12491592 | A      | 0.1536 | 0.0939 | 0.5051                        | 0.0963                          | 0.08318                         | 0.1237            | rs7617297           | 0.3073          | 0.2592          |
| chr3:8378739-8381919      | BC020876                                    | 2                   | 129448             | 3.51E-4  | rs359030   | C      | 0.1648 | 0.1033 | 0.1446                        | 0.1147                          | 0.08535                         | 0.1139            | rs358994            | 0.1055          | 0.0754          |
| chr6:25570803-25574868    | LRRC16A                                     | 2                   | 0                  | 3.61E-4  | rs4320355  | T      | 0.3799 | 0.2898 | 0.2219                        | 0.2844                          | 0.2469                          | 0.1896            | rs301396            | 0.445           | 0.3993          |
| chr6:153354039-153355207  | MTRF1L                                      | 2                   | 0                  | 3.81E-4  | rs9322400  | T      | 0.4469 | 0.3526 | 0.454                         | 0.3945                          | 0.3688                          | 0.454             | rs9322400           | 0.3945          | 0.3688          |
| chr3:284363-285747        | <b><u>CHL1</u></b>                          | 2                   | 19083              | 4.31E-4  | rs17273893 | T      | 0.148  | 0.0908 | 0.6342                        | 0.0963                          | 0.08678                         | 0.6342            | rs17273893          | 0.0963          | 0.0868          |
| chr8:121001793-121010709  | DEPDC6                                      | 2                   | 0                  | 4.41E-4  | rs869340   | C      | 0.324  | 0.2402 | 0.7402                        | 0.3073                          | 0.2966                          | 0.682             | rs4871793           | 0.3113          | 0.2978          |
| chr2:65518304-65520560    | FLJ16124                                    | 2                   | 784                | 5.20E-4  | rs1194849  | G      | 0.3659 | 0.4614 | <b>0.01381</b>                | 0.3899                          | 0.4771                          | <b>0.0119</b>     | rs1876518           | 0.3853          | 0.4744          |
| chr21:27713547-27722878   | BC043580                                    | 2                   | 19690              | 5.51E-4  | rs469709   | A      | 0.1704 | 0.1095 | 0.9615                        | 0.0963                          | 0.09532                         | 0.6677            | rs17631106          | 0.0688          | 0.0769          |

**Bold underline:** Known immunological function Gene

**Supplementary Table 8: Genomic Regions with Multiple SNPs in the 1000 most Significant Associations**

| Region Genomic Span | Gene                    | Distance | Distance From Exon | Count SNPs Top 1000 | BestP    | BestSNP   | F_A    | F_U    |
|---------------------|-------------------------|----------|--------------------|---------------------|----------|-----------|--------|--------|
| chr6:27236785-      | <b><u>MHC, Many</u></b> | 0        | 0                  | 110                 | 8.62E-10 | rs3117426 | 0.3268 | 0.1907 |

|                                 |                                                                                                                                                                       |          |         |   |         |            |         |         |  |
|---------------------------------|-----------------------------------------------------------------------------------------------------------------------------------------------------------------------|----------|---------|---|---------|------------|---------|---------|--|
| <b>32521295</b>                 |                                                                                                                                                                       |          |         |   |         |            |         |         |  |
| <b>chr8:23746576-24681608</b>   | ADAM28, <b>ADAM7</b> ,ADAMDEC1,STC1                                                                                                                                   | <b>0</b> | 0       | 4 | 6.24E-6 | rs4872262  | 0.03911 | 0.01069 |  |
| chr6:42776382-43502348          | CRIP3,CUL7,GNMT,KLC4,KLHDC3,MEA1,MRPL2, <b>PARC</b> ,PEAS,PEX6, <b>PPP2R5D</b> ,PRPH2,PTCRA, <b>PTKZ</b> ,RPL7L1,SLC22A7,SRF,TBCC, <b>TNRC5</b> ,TTBK1,UNQ1934,ZNF318 | 0        | 0       | 4 | 1.22E-5 | rs422717   | 0.2961  | 0.1982  |  |
| chr14:39744450-39909619         | <i>BX248273</i>                                                                                                                                                       | 584047   | 584047  | 4 | 1.69E-5 | rs6571989  | 0.1927  | 0.115   |  |
| <b>chr4:189671181-189676119</b> | <b>AK095968</b>                                                                                                                                                       | <b>0</b> | 18764   | 2 | 1.78E-5 | rs1606234  | 0.2961  | 0.4124  |  |
| chr16:6120908-6137836           | <i>A2BP1</i>                                                                                                                                                          | 0        | 110914  | 4 | 1.85E-5 | rs12924882 | 0.1313  | 0.06915 |  |
| chr2:224812598-224841089        | <i>FAM124B</i>                                                                                                                                                        | 110570   | 110570  | 4 | 1.89E-5 | rs4264554  | 0.3184  | 0.4353  |  |
| chr2:45599872-45895169          | <i>PRKCE,SRBD1</i>                                                                                                                                                    | 0        | 0       | 7 | 2.12E-5 | rs17322265 | 0.3408  | 0.4576  |  |
| <b>chr10:73083830-73084583</b>  | <b>CDH23,KIAA1812</b>                                                                                                                                                 | <b>0</b> | 7287    | 2 | 2.45E-5 | rs7087554  | 0.5894  | 0.4729  |  |
| chr2:74996818-75001224          | <i>AK125960</i>                                                                                                                                                       | 7650     | 7650    | 2 | 3.25E-5 | rs3771781  | 0.3184  | 0.4319  |  |
| chr20:55079605-55083403         | <b>BMP7</b>                                                                                                                                                           | 95559    | 95559   | 2 | 4.44E-5 | rs6127923  | 0.2318  | 0.1498  |  |
| <b>chr7:4270929-4287047</b>     | <b>SDK1</b>                                                                                                                                                           | <b>0</b> | 0       | 5 | 4.70E-5 | rs895710   | 0.2905  | 0.4003  |  |
| chr20:15025030-15074507         | <i>C20orf133</i>                                                                                                                                                      | 0        | 50997   | 4 | 5.15E-5 | rs6043091  | 0.2151  | 0.1367  |  |
| chr8:8804291-8808564            | <b>MFHAS1</b>                                                                                                                                                         | 15750    | 15750   | 3 | 6.80E-5 | rs400404   | 0.3715  | 0.2726  |  |
| chr1:158072814-158076453        | <i>CR625159,RP11-190A12.4,SLAMF8</i>                                                                                                                                  | 0        | 0       | 2 | 7.31E-5 | rs10494349 | 0.2067  | 0.1312  |  |
| chr18:25213638-25220939         | <i>CDH2</i>                                                                                                                                                           | 1202449  | 1202449 | 2 | 7.53E-5 | rs9950880  | 0.2821  | 0.1943  |  |
| chr3:106535466-107174255        | <b>ALCAM,CBLB,Nbla00127</b>                                                                                                                                           | 0        | 0       | 5 | 8.57E-5 | rs13062596 | 0.4358  | 0.3328  |  |
| chr6:85682448-85684185          | <i>TBX18</i>                                                                                                                                                          | 151830   | 151830  | 2 | 9.07E-5 | rs9444253  | 0.05028 | 0.1187  |  |
| <b>chr1:20369369-20490791</b>   | <b>FLJ32784,UBXN10</b>                                                                                                                                                | <b>0</b> | 0       | 7 | 9.09E-5 | rs7514144  | 0.2654  | 0.1808  |  |
| <b>chr10:27709830-27728115</b>  | <b>PTCHD3</b>                                                                                                                                                         | <b>0</b> | 0       | 7 | 9.77E-5 | rs506659   | 0.4022  | 0.3026  |  |
| chr12:123259607-123275011       | <i>FAM101A</i>                                                                                                                                                        | 64652    | 64652   | 4 | 1.01E-4 | rs7972182  | 0.3855  | 0.2874  |  |
| chr13:68136436-68138181         | <i>BC042673</i>                                                                                                                                                       | 195237   | 195237  | 2 | 1.09E-4 | rs287355   | 0.2219  | 0.3213  |  |
| chr16:69996550-70004357         | <b>CALB2</b>                                                                                                                                                          | 14714    | 14714   | 2 | 1.09E-4 | rs12102284 | 0.1676  | 0.1015  |  |
| chr11:25128661-25130289         | <i>LUZP2</i>                                                                                                                                                          | 67899    | 67899   | 2 | 1.10E-4 | rs11028465 | 0.3352  | 0.2426  |  |
| chr12:49729991-49731928         | <i>DKFZp586A011,LETMD1</i>                                                                                                                                            | 0        | 214     | 2 | 1.22E-4 | rs4768959  | 0.1397  | 0.08033 |  |
| chr4:25702025-25756263          | <i>LOC389203</i>                                                                                                                                                      | 161493   | 161493  | 5 | 1.34E-4 | rs2048507  | 0.257   | 0.1755  |  |
| chr7:13858986-13866233          | <i>ETV1</i>                                                                                                                                                           | 31148    | 31148   | 4 | 1.35E-4 | rs12532319 | 0.09218 | 0.04617 |  |
| <b>chr1:59987116-59993733</b>   | <b>FLJ10986,RP11-242B9.1</b>                                                                                                                                          | <b>0</b> | 2458    | 2 | 1.52E-4 | rs11207520 | 0.3994  | 0.3026  |  |
| chr6:12070732-12073684          | <b>HIVEP1</b>                                                                                                                                                         | 47026    | 47026   | 2 | 1.54E-4 | rs12193434 | 0.09777 | 0.05034 |  |
| chr19:40814281-40815243         | <i>MGC10433</i>                                                                                                                                                       | 0        | 134     | 2 | 1.55E-4 | rs2285415  | 0.352   | 0.4559  |  |
| chr6:139472753-139477571        | <i>HECA</i>                                                                                                                                                           | 20371    | 20371   | 2 | 1.56E-4 | rs17304375 | 0.2318  | 0.1549  |  |
| <b>chr12:80435676-80444630</b>  | <b>PPFIA2</b>                                                                                                                                                         | <b>0</b> | 59900   | 2 | 1.63E-4 | rs2400955  | 0.4134  | 0.3159  |  |

|                                  |                                                                                 |          |        |   |         |            |         |         |
|----------------------------------|---------------------------------------------------------------------------------|----------|--------|---|---------|------------|---------|---------|
| chr12:69717561-69720071          | <i>TSPAN8</i>                                                                   | 85073    | 85073  | 2 | 1.63E-4 | rs6581986  | 0.2905  | 0.2053  |
| <b>chr11:102069786-102079454</b> | <b><i>MMP27</i></b>                                                             | <b>0</b> | 0      | 2 | 1.69E-4 | rs17099394 | 0.1229  | 0.0687  |
| chr3:188168001-188168026         | <b><i>ST6GAL1</i></b>                                                           | 0        | 3593   | 2 | 1.71E-4 | rs12495023 | 0.2765  | 0.1934  |
| <b>chr16:71592439-71594134</b>   | <b><i>ATBF1</i></b>                                                             | <b>0</b> | 40845  | 2 | 1.80E-4 | rs8056528  | 0.3687  | 0.2754  |
| <b>chr8:124729628-124734756</b>  | <b><i>C8ORFK36</i></b>                                                          | <b>0</b> | 0      | 4 | 2.05E-4 | rs4871402  | 0.06425 | 0.1325  |
| chr22:42908147-43159207          | <i>KIAA1644,PARVG</i>                                                           | 0        | 0      | 8 | 2.27E-4 | rs80303    | 0.3994  | 0.5013  |
| chr20:44622587-44638545          | <i>NADC3,SLC13A3</i>                                                            | 0        | 0      | 5 | 2.49E-4 | rs393990   | 0.09218 | 0.1664  |
| chr1:9459963-9467504             | <i>SLC25A33</i>                                                                 | 54611    | 54611  | 2 | 2.57E-4 | rs10746490 | 0.1453  | 0.2292  |
| <b>chr3:7364204-7369287</b>      | <b><i>GRM7</i></b>                                                              | <b>0</b> | 40865  | 4 | 2.96E-4 | rs12491592 | 0.1536  | 0.0939  |
| chr11:46472478-46855347          | <i>ARHGAP1, CKAP5, CR612190, F2, LRP4, MEGF7, ZNF408, coagulation factor II</i> | 0        | 0      | 4 | 3.19E-4 | rs2306029  | 0.3603  | 0.4593  |
| chr2:181999958-182002374         | <i>AK125001</i>                                                                 | 27433    | 27433  | 2 | 3.22E-4 | rs16867404 | 0.09497 | 0.05008 |
| chr7:121184414-121193891         | <b><i>PTPRZ1</i></b>                                                            | 106504   | 106504 | 2 | 3.24E-4 | rs1196493  | 0.5251  | 0.4266  |
| <b>chr3:8378739-8381919</b>      | <b><i>BC020876</i></b>                                                          | <b>0</b> | 129448 | 2 | 3.51E-4 | rs359030   | 0.1648  | 0.1033  |
| <b>chr6:25570803-25574868</b>    | <b><i>LRRC16</i></b>                                                            | <b>0</b> | 0      | 2 | 3.61E-4 | rs4320355  | 0.3799  | 0.2898  |
| chr4:131889955-131893245         | <i>BC041448</i>                                                                 | 793982   | 793982 | 2 | 3.68E-4 | rs2125639  | 0.2905  | 0.2094  |
| chr15:58159939-58162165          | <i>FOXB1</i>                                                                    | 74505    | 74505  | 2 | 3.71E-4 | rs7168491  | 0.1648  | 0.1035  |
| <b>chr6:153354039-153355207</b>  | <b><i>MTRF1L</i></b>                                                            | <b>0</b> | 0      | 2 | 3.81E-4 | rs9322400  | 0.4469  | 0.3526  |
| chr5:172969660-172992688         | <i>FAM44B</i>                                                                   | 0        | 0      | 4 | 3.83E-4 | rs258873   | 0.2849  | 0.3798  |
| chr6:55433518-55442340           | <i>HMGCLL1</i>                                                                  | 0        | 21202  | 2 | 3.86E-4 | rs9382494  | 0.2179  | 0.3078  |
| chr9:15192417-15195014           | <i>C9orf52</i>                                                                  | 0        | 0      | 2 | 3.87E-4 | rs693196   | 0.3603  | 0.2723  |
| chr4:20207250-20210955           | <i>SLIT2</i>                                                                    | 0        | 0      | 2 | 4.29E-4 | rs573118   | 0.243   | 0.169   |
| <b>chr3:284363-285747</b>        | <b><i>CHL1</i></b>                                                              | <b>0</b> | 19083  | 2 | 4.31E-4 | rs17273893 | 0.148   | 0.09081 |
| chr11:45198534-45198959          | <i>PRDM11</i>                                                                   | 0        | 650    | 2 | 4.36E-4 | rs12417962 | 0.06983 | 0.1351  |
| chr3:138891290-138892064         | <i>SOX14</i>                                                                    | 74205    | 74205  | 2 | 4.37E-4 | rs12637203 | 0.1844  | 0.12    |
| <b>chr8:121001793-121010709</b>  | <b><i>DEPDC6</i></b>                                                            | <b>0</b> | 0      | 2 | 4.41E-4 | rs869340   | 0.324   | 0.2402  |
| chr18:74518781-74526115          | <i>SALL3</i>                                                                    | 315148   | 315148 | 2 | 4.72E-4 | rs2931060  | 0.1257  | 0.07381 |
| chr4:143965929-143971867         | <i>INPP4B</i>                                                                   | 0        | 14945  | 2 | 4.81E-4 | rs10000770 | 0.1788  | 0.1158  |
| chr3:115619659-115623404         | <i>ZBTB20</i>                                                                   | 0        | 29017  | 2 | 5.19E-4 | rs2718419  | 0.2598  | 0.1844  |
| <b>chr2:65518304-65520560</b>    | <b><i>FLJ16124</i></b>                                                          | <b>0</b> | 784    | 2 | 5.20E-4 | rs1194849  | 0.3659  | 0.4614  |
| chr5:68236398-68245085           | <i>AK128486</i>                                                                 | 55041    | 55041  | 2 | 5.27E-4 | rs7718291  | 0.1313  | 0.2081  |
| <b>chr21:27713547-27722878</b>   | <b><i>BC043580</i></b>                                                          | <b>0</b> | 19690  | 2 | 5.51E-4 | rs469709   | 0.1704  | 0.1095  |
| chr3:5866648-5866856             | <i>EDEM1</i>                                                                    | 630006   | 630006 | 2 | 5.91E-4 | rs2572690  | 0.1145  | 0.06602 |
| chr16:7470020-7474240            | <i>A2BP1</i>                                                                    | 0        | 33910  | 2 | 5.93E-4 | rs2191388  | 0.2709  | 0.1948  |
| chr6:88936647-                   | <b><i>CNR1</i></b>                                                              | 4366     | 4366   | 2 | 6.35E-4 | rs9344757  | 0.2179  | 0.3041  |

|                           |                          |         |         |   |         |            |         |         |
|---------------------------|--------------------------|---------|---------|---|---------|------------|---------|---------|
| 88941540                  |                          |         |         |   |         |            |         |         |
| chr4:32018838-32029980    | <i>PCDH7</i>             | 1265004 | 1265004 | 3 | 6.41E-4 | rs2130904  | 0.2458  | 0.3343  |
| chr1:202125395-202130221  | <i>SNRPE</i>             | 18492   | 18492   | 2 | 6.48E-4 | rs12145634 | 0.1369  | 0.08346 |
| chr7:38733082-38736264    | <i>HVPS41,VPS41</i>      | 0       | 0       | 2 | 6.67E-4 | rs10255854 | 0.2179  | 0.3038  |
| chr11:120260865-120269428 | <i>GRIK4</i>             | 0       | 5023    | 2 | 6.67E-4 | rs12577638 | 0.2011  | 0.1356  |
| chr11:91278373-91283755   | <i>FAT3</i>              | 444245  | 444245  | 2 | 6.97E-4 | rs10501763 | 0.03911 | 0.09207 |
| chr16:20151678-20152281   | <i>GP2</i>               | 77031   | 77031   | 2 | 7.14E-4 | rs9921767  | 0.0419  | 0.09572 |
| chr1:221871750-221882793  | <b><u>CAPN2</u></b>      | 84031   | 84031   | 3 | 7.29E-4 | rs3856154  | 0.4134  | 0.3254  |
| chr10:130929688-130931369 | <b><u>MGMT</u></b>       | 224087  | 224087  | 2 | 7.33E-4 | rs538186   | 0.05307 | 0.1104  |
| chr5:170727300-170734557  | <b><u>NPM1</u></b>       | 12168   | 12168   | 2 | 7.52E-4 | rs7707008  | 0.1173  | 0.1894  |
| chr10:63071553-63080172   | <i>C10orf107</i>         | 12553   | 12553   | 2 | 7.69E-4 | rs10994852 | 0.1061  | 0.06051 |
| chr21:31427707-31432285   | <i>TIAM1</i>             | 0       | 0       | 2 | 7.93E-4 | rs2833297  | 0.2095  | 0.1435  |
| chr4:42434168-42438752    | <i>ATP8A1</i>            | 80521   | 80521   | 2 | 8.09E-4 | rs6812482  | 0.2709  | 0.1965  |
| chr6:161106705-161109328  | <i>PLG</i>               | 12377   | 12377   | 2 | 8.78E-4 | rs9295131  | 0.2151  | 0.2986  |
| chr17:12323188-12325534   | <i>AX747308,BC122562</i> | 68477   | 68477   | 2 | 9.02E-4 | rs8069430  | 0.2584  | 0.186   |
| chr17:50125991-50127579   | <i>TOM1L1,tom1-like</i>  | 205624  | 205624  | 2 | 9.20E-4 | rs6504930  | 0.03371 | 0.08325 |
| chr16:77330083-77334376   | <b><u>WWOX</u></b>       | 0       | 305933  | 2 | 9.21E-4 | rs1364290  | 0.1844  | 0.1231  |
| chr11:5493737-5511794     | <i>HBG2,UBQLNL</i>       | 0       | 0       | 4 | 9.28E-4 | rs2047456  | 0.3436  | 0.2624  |
| chr3:70644812-70648510    | <i>LOC401072</i>         | 96929   | 96929   | 2 | 9.91E-4 | rs17790790 | 0.5196  | 0.4293  |
| chr3:1292289-1302261      | <b><u>CNTN6</u></b>      | 0       | 0       | 2 | 1.06E-3 | rs6799262  | 0.3571  | 0.2733  |
| chr3:64977356-64985877    | <i>BC040632</i>          | 5173    | 5173    | 2 | 1.15E-3 | rs1517927  | 0.2318  | 0.1643  |
| chr5:14818187-14825245    | <i>ANKH</i>              | 0       | 0       | 2 | 1.15E-3 | rs17251715 | 0.3955  | 0.3113  |

**Supplementary Table 9. Most Significant Associated Regions Based on Subphenotype Genotype Association**

**A) Cancer**

| Significant Region       | P-value | SNP        | A1 | F_A    | F_U    | OR    | Count SNPs | Gene         | Distance | Distance From Exon |
|--------------------------|---------|------------|----|--------|--------|-------|------------|--------------|----------|--------------------|
| chr14: 23168471-23169215 | 4.57E-7 | rs222723   | C  | 0.6154 | 0.1968 | 6.531 | 2          | <i>DHRS2</i> | 0        | 0                  |
| chr6:140225308-140225386 | 1.53E-6 | rs12111348 | T  | 0.4231 | 0.1064 | 6.157 | 2          | BC039503     | 2009     | 2009               |

**B) Lymphoma**

| Significant Region       | P-value  | SNP        | A1 | F_A    | F_U      | OR    | Count SNPs | Gene                          | Distance | Distance From Exon |
|--------------------------|----------|------------|----|--------|----------|-------|------------|-------------------------------|----------|--------------------|
| chrX:132092989-132095451 | 5.50E-10 | rs5977837  | C  | 0.2778 | 0.02174  | 17.31 | 2          | <i>TFDP3</i>                  | 82912    | 82912              |
| chr10:58755852-58767334  | 1.36E-9  | rs16910534 | T  | 0.2222 | 0.01383  | 20.37 | 3          | <i>IPMK</i>                   | 858286   | 858286             |
| chr7:90245135-90245280   | 1.69E-8  | rs975004   | G  | 0.3333 | 0.03953  | 12.15 | 2          | <i>KIAA0834, <u>PFTK1</u></i> | 0        | 12544              |
| chr5:156402979-156407976 | 3.62E-8  | rs10038271 | T  | 0.7222 | 0.1877   | 11.25 | 2          | <u><i>HAVCR1</i></u>          | 0        | 651                |
| chr1:55704352-55706323   | 2.85E-7  | rs356086   | G  | 0.1111 | 0.003953 | 31.5  | 2          | <i>FLJ45337</i>               | 112975   | 112975             |
| chr1:106430611-106438079 | 1.55E-6  | rs11184786 | T  | 0.3333 | 0.05336  | 8.87  | 2          | <i>BC043293</i>               | 467531   | 467531             |

**C) Lymphadenopathy**

| Significant Region        | P-value | SNP        | A1 | F_A    | F_U     | OR     | Count SNPs | Gene               | Distance | Distance From Exon |
|---------------------------|---------|------------|----|--------|---------|--------|------------|--------------------|----------|--------------------|
| chrX:53035117-53039801    | 1.90E-7 | rs10127016 | G  | 0.3833 | 0.125   | 4.351  | 2          | <i>TMEM29</i>      | 0        | 1409               |
| chr12:30583074-30598457   | 4.82E-7 | rs1905675  | C  | 0.2    | 0.5453  | 0.2085 | 2          | <i>IPO8</i>        | 74732    | 74732              |
| chr14:64723761-64783067   | 8.09E-7 | rs4299072  | A  | 0.1667 | 0.02802 | 6.938  | 4          | <i>BX161428</i>    | 0        | 0                  |
| chr5:141916656-141926115  | 1.13E-6 | rs17706715 | A  | 0.2333 | 0.05603 | 5.127  | 2          | <u><i>FGF1</i></u> | 27191    | 27191              |
| chr11:101265604-101266102 | 1.55E-6 | rs17097290 | T  | 0.15   | 0.02371 | 7.267  | 2          | <i>ANGPTL5</i>     | 513      | 513                |

**D) Nodular regenerative hyperplasia of the liver (NRH)**

| Significant Region       | P-value  | SNP        | A1 | F_A    | F_U      | OR    | Count SNPs | Gene                      | Distance | Distance From Exon |
|--------------------------|----------|------------|----|--------|----------|-------|------------|---------------------------|----------|--------------------|
| chr1:68153970-68161019   | 2.29E-10 | rs1926283  | C  | 0.2308 | 0.01807  | 16.3  | 3          | <i>AK096081, AK124028</i> | 0        | 33408              |
| chr21:18188480-18192815  | 2.84E-7  | rs7280675  | G  | 0.1923 | 0.02008  | 11.62 | 2          | <i>CHODL</i>              | 2636     | 2636               |
| chr21:45476504-45476918  | 3.23E-7  | rs4592938  | A  | 0.1154 | 0.006024 | 21.52 | 2          | <i>C21orf89</i>           | 1777     | 1777               |
| chr8:143046590-143055893 | 1.18E-6  | rs12676273 | G  | 0.3462 | 0.07229  | 6.794 | 3          | <i>TSNARE1</i>            | 235455   | 235455             |

|                        |         |           |   |        |         |       |   |                 |       |       |
|------------------------|---------|-----------|---|--------|---------|-------|---|-----------------|-------|-------|
| chrX:27453340-27462759 | 1.29E-6 | rs5971431 | C | 0.3077 | 0.05823 | 7.188 | 3 | <i>AK057304</i> | 55692 | 55692 |
|------------------------|---------|-----------|---|--------|---------|-------|---|-----------------|-------|-------|

### **E) LIP**

| Significant Region        | P-value | SNP        | A1 | F_A  | F_U     | OR    | Count SNPs | Gene          | Distance | Distance From Exon |
|---------------------------|---------|------------|----|------|---------|-------|------------|---------------|----------|--------------------|
| chr13:101641990-101673539 | 5.76E-8 | rs1336698  | G  | 0.65 | 0.168   | 9.197 | 6          | <i>FGF14</i>  | 0        | 69139              |
| chrX:143116309-143119321  | 6.77E-8 | rs6649722  | A  | 0.3  | 0.0377  | 10.94 | 3          | <i>UBE2NL</i> | 320286   | 320286             |
| chrX:47642545-47651320    | 7.70E-8 | rs12387999 | A  | 0.2  | 0.016   | 15.38 | 2          | <i>ZNF81</i>  | 0        | 2262               |
| chr2:109118795-109120561  | 4.62E-7 | rs375099   | C  | 0.25 | 0.02976 | 10.87 | 2          | <i>POSH2</i>  | 0        | 5794               |
| chrX:30122360-30125674    | 2.52E-6 | rs5927496  | C  | 0.7  | 0.2341  | 7.633 | 2          | <i>MAGEB2</i> | 17927    | 17927              |

### **F) Bronchiectasis**

| Significant Region       | P-value | SNP        | A1 | F_A     | F_U    | OR     | Count SNPs | Gene                                | Distance | Distance From Exon |
|--------------------------|---------|------------|----|---------|--------|--------|------------|-------------------------------------|----------|--------------------|
| chrX:22422160-22428888   | 5.71E-8 | rs5925651  | A  | 0.3462  | 0.1386 | 3.291  | 3          | <i>ZNF645</i>                       | 219665   | 219665             |
| chr2:200959722-201175137 | 2.39E-6 | rs13019534 | G  | 0.5064  | 0.2908 | 2.503  | 2          | <i>AOX1, DNAPTP6, KCTD18, SGOL2</i> | 0        | 0                  |
| chr8:15782386-15788801   | 2.92E-6 | rs1563297  | A  | 0.5321  | 0.3152 | 2.47   | 2          | <i>TUSC3</i>                        | 116020   | 116020             |
| chr19:51765478-51768118  | 6.30E-6 | rs6509286  | C  | 0.4167  | 0.2228 | 2.491  | 2          | <i>AK094504</i>                     | 0        | 27862              |
| chrX:68569536-68573727   | 1.04E-5 | rs7056340  | A  | 0.3141  | 0.1467 | 2.663  | 2          | <i>TMEM28</i>                       | 68076    | 68076              |
| chr6:32508322-32510683   | 1.12E-5 | rs2027856  | T  | 0.02564 | 0.163  | 0.1351 | 2          | <b><i>HLA-DRA</i></b>               | 4942     | 4942               |

### **G) Granuloma**

| Significant Region      | P-value | SNP        | A1 | F_A    | F_U     | OR    | Count SNPs | Gene                                          | Distance | Distance From Exon |
|-------------------------|---------|------------|----|--------|---------|-------|------------|-----------------------------------------------|----------|--------------------|
| chr11:12182328-12186013 | 4.83E-6 | rs16910765 | T  | 0.2206 | 0.05921 | 4.497 | 3          | <i>KIAA0750, MICAL2, MICAL2PV1, MICAL2PV2</i> | 0        | 0                  |
| chr1:33674005-33683227  | 1.26E-5 | rs12751162 | A  | 0.3824 | 0.1601  | 3.248 | 2          | <i>PHC2</i>                                   | 4803     | 4803               |
| chr6:88453628-88454474  | 2.04E-5 | rs2250276  | G  | 0.1765 | 0.04386 | 4.671 | 2          | <b><i>AKIRIN2</i></b>                         | 0        | 5428               |
| chrX:27453340-27462759  | 3.18E-5 | rs5971431  | C  | 0.1912 | 0.05263 | 4.255 | 2          | <i>AK057304</i>                               | 55692    | 55692              |

### **H) GI Enteropathy**

| Significant Region      | P-value | SNP       | A1 | F_A    | F_U    | OR    | Count SNPs | Gene                  | Distance | Distance From Exon |
|-------------------------|---------|-----------|----|--------|--------|-------|------------|-----------------------|----------|--------------------|
| chr12:2531014-2538733   | 1.21E-7 | rs4765961 | C  | 0.4737 | 0.142  | 5.439 | 3          | <b><i>CACNA1C</i></b> | 0        | 0                  |
| chr10:26643326-26646318 | 2.90E-6 | rs7903552 | G  | 0.3684 | 0.107  | 4.869 | 2          | <b><i>GAD2</i></b>    | 9833     | 9833               |
| chr5:11592622-11597026  | 6.26E-6 | rs2727602 | T  | 0.6053 | 0.2613 | 4.334 | 2          | <i>CTNND2</i>         | 0        | 21030              |



|                         |         |           |   |        |         |       |   |                 |        |        |
|-------------------------|---------|-----------|---|--------|---------|-------|---|-----------------|--------|--------|
| chr21:42551877-42552623 | 9.95E-6 | rs3787986 | T | 0.3684 | 0.1152  | 4.479 | 4 | <i>ABCG1</i>    | 0      | 0      |
| chr9:4033590-4039110    | 1.13E-5 | rs676472  | C | 0.2895 | 0.07613 | 4.944 | 3 | <i>GLIS3</i>    | 0      | 68391  |
| chr4:33014145-33017023  | 1.43E-5 | rs6846113 | A | 0.1053 | 0.01029 | 11.32 | 2 | <i>AK093205</i> | 552926 | 552926 |

### I) Malabsorption

| Significant Region        | P-value | SNP        | A1 | F_A    | F_U     | OR    | Count SNPs | Gene                                | Distance | Distance From Exon |
|---------------------------|---------|------------|----|--------|---------|-------|------------|-------------------------------------|----------|--------------------|
| chr20:55901032-55985359   | 3.21E-9 | rs8124301  | T  | 0.4231 | 0.07631 | 8.877 | 5          | <i>C20orf85</i>                     | 174030   | 174030             |
| chr7:117377201-117382435  | 9.94E-7 | rs17140937 | C  | 0.2692 | 0.04418 | 7.971 | 2          | <i>CTTNBP2</i>                      | 76404    | 76404              |
| chr11:124071934-124079438 | 1.25E-6 | rs1784539  | G  | 0.6154 | 0.2068  | 6.136 | 2          | <b><u>SPA17</u></b>                 | 2037     | 2037               |
| chr10:30255454-30255817   | 5.18E-6 | rs11007812 | T  | 0.3077 | 0.06426 | 6.472 | 2          | <i>CR626438</i>                     | 85918    | 85918              |
| chr12:31276546-31281817   | 6.76E-6 | rs12819069 | C  | 0.3846 | 0.09839 | 5.727 | 2          | <i>OVOS2</i>                        | 26191    | 26191              |
| chr8:6374232-6376048      | 8.56E-6 | rs2515477  | T  | 0.4231 | 0.1185  | 5.456 | 2          | <b><u>ANGPT2</u></b> , <i>MCPH1</i> | 0        | 1213               |

### J) Splenectomy

| Significant Region       | P-value | SNP        | A1 | F_A    | F_U      | OR    | Count SNPs | Gene                    | Distance | Distance From Exon |
|--------------------------|---------|------------|----|--------|----------|-------|------------|-------------------------|----------|--------------------|
| chr9:130092787-130095025 | 1.03E-6 | rs7026795  | A  | 0.425  | 0.1802   | 3.363 | 2          | <i>C9orf119</i>         | 1698     | 1698               |
| chr3:72044083-72052222   | 1.11E-6 | rs7648163  | C  | 0.55   | 0.2748   | 3.226 | 2          | <i>AK097190</i>         | 115138   | 115138             |
| chr1:73821234-73888127   | 2.23E-6 | rs4606267  | G  | 0.325  | 0.1194   | 3.552 | 3          | <i>BC041341</i>         | 244086   | 244086             |
| chr9:70762083-70815910   | 2.46E-6 | rs2993008  | T  | 0.225  | 0.06306  | 4.313 | 2          | <i>AK057188,PIP5K1B</i> | 0        | 0                  |
| chr8:137069094-137070609 | 3.13E-6 | rs6985828  | C  | 0.0625 | 0.002252 | 29.53 | 2          | <i>KHDRBS3</i>          | 340064   | 340064             |
| chr15:66415767-66419741  | 3.78E-6 | rs6494736  | C  | 0.175  | 0.04054  | 5.02  | 2          | <i>ITGA11</i>           | 0        | 0                  |
| chr7:141314419-141314653 | 2.60E-5 | rs11761774 | A  | 0.475  | 0.2455   | 2.781 | 2          | <i>TAS2R38</i>          | 4247     | 4247               |

### K) Cytopenias

| Significant Region    | P-value  | SNP        | A1 | F_A    | F_U    | OR     | Count SNPs | Gene                                                                  | Distance | Distance From Exon |
|-----------------------|----------|------------|----|--------|--------|--------|------------|-----------------------------------------------------------------------|----------|--------------------|
| chr12:3711033-4573405 | 4.28E-6  | rs241964   | C  | 0.6111 | 0.3    | 3.667  | 6          | <i>C12orf4,C12orf5,CCND2,DYRK4,EFCAB4B,FGF23,FGF6,PARP11,RAD51AP1</i> | 0        | 0                  |
| chr8:2721609-2723174  | 3.52E-5  | rs341672   | C  | 0.2593 | 0.0812 | 3.961  | 2          | <i>CSMD1,KIAA1890</i>                                                 | 59615    | 59615              |
| chr3:2628577-2629597  | 0.000337 | rs1020997  | G  | 0.2407 | 0.4979 | 0.3198 | 2          | <b><u>CNTN4</u></b>                                                   | 0        | 40335              |
| chr2:1783619-1783961  | 0.000426 | rs6548056  | G  | 0.1852 | 0.434  | 0.2963 | 2          | <i>MYT1L</i>                                                          | 0        | 514                |
| chr11:2240035-2241166 | 0.000533 | rs17659078 | A  | 0.4444 | 0.2286 | 2.699  | 2          | <i>ASCL2</i>                                                          | 5138     | 5138               |

|                       |          |            |   |        |        |       |   |                 |        |        |
|-----------------------|----------|------------|---|--------|--------|-------|---|-----------------|--------|--------|
| chr10:1236883-1237022 | 0.000603 | rs10794730 | T | 0.4815 | 0.2596 | 2.649 | 2 | <i>ADARB2</i>   | 0      | 583    |
| chr9:1588885-1595735  | 0.000866 | rs1923928  | T | 0.1852 | 0.4191 | 0.315 | 2 | <i>SMARCA2</i>  | 409607 | 409607 |
| chr1:4222578-4225577  | 0.000884 | rs966321   | C | 0.2593 | 0.4979 | 0.353 | 2 | <i>AX748168</i> | 146394 | 146394 |

### L) organ specific autoimmunity (OSAI)

| Significant Region       | P-value | SNP       | A1 | F_A    | F_U     | OR     | Count SNPs | Gene            | Distance | Distance From Exon |
|--------------------------|---------|-----------|----|--------|---------|--------|------------|-----------------|----------|--------------------|
| chr8:101728102-101728344 | 6.89E-8 | rs7815950 | G  | 0.2133 | 0.05615 | 4.559  | 2          | <i>SNX31</i>    | 0        | 2334               |
| chrX:39933689-39956544   | 5.18E-7 | rs2948491 | A  | 0.18   | 0.04545 | 4.61   | 4          | <i>BCOR</i>     | 12163    | 12163              |
| chr3:109180117-109186346 | 6.27E-6 | rs709477  | A  | 0.2733 | 0.4893  | 0.3926 | 2          | <i>BC101231</i> | 50156    | 50156              |
| chr1:37438130-37446852   | 6.96E-6 | rs6426015 | A  | 0.2667 | 0.1096  | 2.953  | 3          | <i>GRIK3</i>    | 165699   | 165699             |
| chr15:84701881-84720707  | 1.19E-5 | rs1431234 | C  | 0.3    | 0.5108  | 0.4105 | 2          | <i>AGBL1</i>    | 0        | 20894              |

### M) Low IgM (<50 mg/dL)

| Significant Region     | P-value | SNP       | A1 | F_A     | F_U    | OR     | Count SNPs | Gene                | Distance | Distance From Exon |
|------------------------|---------|-----------|----|---------|--------|--------|------------|---------------------|----------|--------------------|
| chr1:25735669-25753653 | 6.02E-8 | rs2065970 | G  | 0.06553 | 0.2411 | 4.529  | 5          | <i>LDLRAP1</i>      | 0        | 0                  |
| chr4:59393803-59398745 | 1.77E-5 | rs2899130 | A  | 0.2257  | 0.4286 | 2.573  | 2          | <i>BC034799</i>     | 1366894  | 1366894            |
| chr5:76127981-76128963 | 2.17E-5 | rs615986  | T  | 0.4927  | 0.2679 | 0.3767 | 2          | <b><i>F2RL1</i></b> | 21647    | 21647              |

### N) Low IgA (<10 mg/dL)

| Significant Region        | P-value | SNP        | A1 | F_A     | F_U    | OR     | Count SNPs | Gene                    | Distance | Distance From Exon |
|---------------------------|---------|------------|----|---------|--------|--------|------------|-------------------------|----------|--------------------|
| chrX:30733771-30736604    | 1.44E-7 | rs11095197 | T  | 0.1469  | 0.3431 | 3.034  | 2          | <b><i>MAP3K7IP3</i></b> | 18876    | 18876              |
| chrX:145696682-145751200  | 3.48E-6 | rs6626815  | C  | 0.5656  | 0.3578 | 0.4279 | 5          | <i>CXorf1</i>           | 977620   | 977620             |
| chr15:47024768-47025722   | 6.75E-6 | rs17469978 | C  | 0.2313  | 0.4167 | 2.375  | 2          | <i>SHC4</i>             | 0        | 16198              |
| chrX:32356174-32388539    | 1.25E-5 | rs699457   | G  | 0.2656  | 0.1078 | 0.3342 | 2          | <i>DMD</i>              | 0        | 0                  |
| chr1:3915418-3917931      | 2.69E-5 | rs10737395 | A  | 0.1     | 0.2353 | 2.769  | 2          | <i>AK124708</i>         | 236      | 236                |
| chr13:101257602-101258342 | 3.22E-5 | rs1322702  | A  | 0.04375 | 0.1471 | 3.768  | 2          | <i>FGF14</i>            | 0        | 60734              |

### O) Low B cells (CD19+ cells <1%)

| Significant Region       | P-value | SNP       | A1 | F_A    | F_U     | OR    | Count SNPs | Gene        | Distance | Distance From Exon |
|--------------------------|---------|-----------|----|--------|---------|-------|------------|-------------|----------|--------------------|
| chr8:13834782-13842376   | 7.62E-8 | rs2682665 | C  | 0.1818 | 0.01394 | 15.71 | 3          | <i>SGCZ</i> | 149368   | 149368             |
| chr7:107306707-107314113 | 2.16E-7 | rs9690688 | A  | 0.3636 | 0.06375 | 8.393 | 2          | <i>DLD</i>  | 4709     | 4709               |

|                         |         |            |   |        |         |       |   |                       |   |   |
|-------------------------|---------|------------|---|--------|---------|-------|---|-----------------------|---|---|
| chr9:33103066-33103970  | 1.40E-6 | rs12379501 | T | 0.3182 | 0.05578 | 7.9   | 2 | <b><u>B4GALT1</u></b> | 0 | 0 |
| chr13:37798435-37846851 | 2.25E-6 | rs4943583  | G | 0.2273 | 0.02988 | 9.549 | 7 | <i>UFM1</i>           | 0 | 0 |

**P) Young age of symptom onset (<10 yrs)**

| Significant Region       | P-value | SNP       | A1 | F_A    | F_U     | OR    | Count SNPs | Gene          | Distance | Distance From Exon |
|--------------------------|---------|-----------|----|--------|---------|-------|------------|---------------|----------|--------------------|
| chrX:152295068-152303019 | 9.84E-8 | rs5987017 | A  | 0.2143 | 0.04773 | 5.442 | 4          | <i>ZNF275</i> | 24829    | 24829              |
| chrX:37803525-37832251   | 1.54E-7 | rs5918500 | C  | 0.4878 | 0.2123  | 3.533 | 3          | <i>SYTL5</i>  | 0        | 0                  |
| chr19:7505735-7508421    | 2.31E-6 | rs604959  | C  | 0.4762 | 0.2273  | 3.091 | 2          | <i>PNPLA6</i> | 0        | 0                  |

**Supplementary Table 10. Most Significant Associated Regions Based on CNV Association**

**A) Deletions**

| CNVR Deletion           | Count SNPs | Distance From Exon | P Deletion | Cases Del | Controls Del | Gene                                                                                                                                                                                                                                                                                        | MSSM | Oxford | USF | CHOP |
|-------------------------|------------|--------------------|------------|-----------|--------------|---------------------------------------------------------------------------------------------------------------------------------------------------------------------------------------------------------------------------------------------------------------------------------------------|------|--------|-----|------|
| chr11:85365857-85381622 | 5          | 0                  | 0.01       | 2         | 0            | <b><u>PICALM</u></b> , <i>PICALM variant protein</i>                                                                                                                                                                                                                                        | 0    | 2      | 0   | 0    |
| chr20:57735790-57741780 | 6          | 5902               | 0.026      | 3         | 4            | <i>PHACTR3</i>                                                                                                                                                                                                                                                                              | 2    | 1      | 0   | 0    |
| chr22:17396663-18417315 | 270        | 0                  | 0.029      | 2         | 1            | <i>ARVCF, C22orf25, C22orf29, CDC45L, CLDN5, CLTCL1, <b><u>COMT</u></b>, CR618542, CR625276, DGCR14, DGCR2, DKFZp761P1121, DKFZp781E0833, GNB1L, GP1BB, GSCL, HIRA, KIAA1647, L77561, LOC128977, MRPL40, SEPT5, SLC25A1, <b><u>TBX1</u></b>, TRXR2A, TSSK2, TXNRD2, U84523, UFD1, UFD1L</i> | 2    | 0      | 0   | 0    |
| chr4:10256682-10264316  | 4          | 2915               | 0.029      | 2         | 1            | <b><u>CLNK</u></b>                                                                                                                                                                                                                                                                          | 0    | 1      | 1   | 0    |
| chr10:46003146-46042543 | 8          | 0                  | 0.029      | 2         | 1            | <i>DKFZp566K0524, PTPN20A, PTPN20B</i>                                                                                                                                                                                                                                                      | 2    | 0      | 0   | 0    |

**B) Duplications**

| CNVR Duplication         | Count SNPs | Distance From Exon | P Dup    | Cases Dup | Controls Dup | Gene                        | MSSM | Oxford | USF | CHOP |
|--------------------------|------------|--------------------|----------|-----------|--------------|-----------------------------|------|--------|-----|------|
| chr2:148396730-148433180 | 6          | 0                  | 8.66E-16 | 15        | 0            | <b><u>ACVR2A, ORC4L</u></b> | 10   | 5      | 0   | 0    |
| chr15:35053039-35063531  | 6          | 23146              | 5.72E-13 | 19        | 10           | <i>MEIS2</i>                | 17   | 2      | 0   | 0    |
| chr10:53044735-53045426  | 4          | 79826              | 9.63E-13 | 12        | 0            | <i>PRKG1</i>                | 12   | 0      | 0   | 0    |
| chr8:77719805-77720240   | 3          | 27377              | 1.05E-09 | 10        | 1            | <i>BC037827</i>             | 10   | 0      | 0   | 0    |
| chr7:91789778-91801963   | 4          | 0                  | 1.20E-09 | 12        | 4            | <i>ANKIB1</i>               | 9    | 3      | 0   | 0    |
| chr2:163316298-163316595 | 3          | 17100              | 1.00E-07 | 7         | 0            | <i>KCNH7</i>                | 6    | 1      | 0   | 0    |
| chr7:87180702-87191931   | 4          | 202                | 7.41E-07 | 7         | 1            | <i>RPIB9</i>                | 5    | 2      | 0   | 0    |
| chr12:72825720-72832667  | 3          | 0                  | 3.04E-06 | 7         | 2            | <i>BC061638</i>             | 7    | 0      | 0   | 0    |
| chr2:203004035-203017311 | 5          | 20466              | 6.58E-05 | 6         | 3            | <i>BMPR2</i>                | 6    | 0      | 0   | 0    |
| chr19:9256584-9277749    | 4          | 0                  | 0.001    | 3         | 0            | <i>ZNF699</i>               | 2    | 0      | 1   | 0    |
| chr4:39190766-           | 6          | 0                  | 0.004    | 3         | 1            | <i>UGDH</i>                 | 1    | 2      | 0   | 0    |

|                          |    |        |       |   |   |                                                       |   |   |   |   |
|--------------------------|----|--------|-------|---|---|-------------------------------------------------------|---|---|---|---|
| 39201960                 |    |        |       |   |   |                                                       |   |   |   |   |
| chr9:112207473-112207708 | 3  | 553    | 0.004 | 3 | 1 | <i>SVEP1</i>                                          | 3 | 0 | 0 | 0 |
| chr7:18903915-18905725   | 4  | 23171  | 0.009 | 3 | 2 | <b><u>HDAC9</u></b>                                   | 1 | 2 | 0 | 0 |
| chr13:64053258-64056530  | 15 | 505114 | 0.01  | 2 | 0 | <i>AK057471,AK098560,BC128161</i>                     | 2 | 0 | 0 | 0 |
| chr14:35408995-35422074  | 5  | 0      | 0.01  | 2 | 0 | <i>BRMS1L</i>                                         | 0 | 2 | 0 | 0 |
| chr5:170531269-170536993 | 4  | 374    | 0.01  | 2 | 0 | <i>DKFZp666P032,RANBP17</i>                           | 1 | 1 | 0 | 0 |
| chr4:91413829-91415037   | 3  | 33381  | 0.01  | 2 | 0 | <i>KIAA1680,MGC48628</i>                              | 2 | 0 | 0 | 0 |
| chr7:34685030-34686172   | 4  | 4517   | 0.01  | 2 | 0 | <i>AAA1,NPSR1</i>                                     | 1 | 1 | 0 | 0 |
| chr3:176427638-176429297 | 7  | 5118   | 0.01  | 2 | 0 | <i>NAALADL2</i>                                       | 2 | 0 | 0 | 0 |
| chr1:170400944-170403742 | 4  | 26274  | 0.01  | 2 | 0 | <i>DNM3</i>                                           | 0 | 1 | 1 | 0 |
| chr2:167031393-167045981 | 4  | 0      | 0.01  | 2 | 0 | <i>Na+ channel,SCN7A</i>                              | 2 | 0 | 0 | 0 |
| chr9:28683005-28687679   | 3  | 21420  | 0.01  | 2 | 0 | <b><u>LINGO2</u></b>                                  | 2 | 0 | 0 | 0 |
| chr9:105860023-105868928 | 9  | 27434  | 0.01  | 2 | 0 | <i>OR13C3,OR13C4,OR13C5,OR13C8,OR13F1,SMC2,hCAP-E</i> | 2 | 0 | 0 | 0 |

## **Supplemental Figure Legends**

Genome-Wide Association Identifies Diverse Causes of Common Variable Immunodeficiency

Jordan S. Orange, Joseph T. Glessner, Elena Resnick, Kathleen E. Sullivan, Mary Lucas, Berne Ferry, Cecilia E. Kim, Cuiping Hou, Fengxiang Wang, Rosetta Chiavacci, Subra Kugathasan, John W. Sleasman, Robert Baldassano, Elena E. Perez, Helen Chapel, Charlotte Cunningham-Rundles, Hakon Hakonarson

### **Supplementary Figure 1. CVID Clinical Subphenotypes**

The core diagnosis of CVID has many clinical progressions with varying frequency. The height and size of subphenotypes signify the frequency of the specific progression. Given significant SNP genotype associations for each CVID subphenotype progression vs. CVID patients without the progression, prediction can be made which may improve clinical outcome.

### **Supplementary Figure 2. Frequency of Deletion and Duplication Copy Number Variations**

Frequency of CNV in cases and controls. CNVs are called on a single sample basis with deletions and duplications in specific genomic regions based on the genotype and intensity signal of contiguous SNPs. These single sample CNV profiles are plotted as a SNP-based statistic to allow for SNP-based association testing. Lastly, neighboring SNPs with similar significance define a CNVR. Red indicates case deletion; Blue indicates case duplication; Black indicates control deletion; Purple indicates control duplication.

### **Supplementary Figure 3. Duplication of *ORC4L* Found Exclusive to 15 CVID Cases**

Vertical blue lines indicate the SNP probe coverage. Green rectangles delineate regions of copy number variation in individual cases. Three exons of *ORC4L* are shown duplicated in 15 cases and 0 controls. It is likely that the duplications could extend to a larger region of *ORC4L* based on coverage.

### **Supplementary Figure 4. CNV Validation with Illumina Intensity Data Review and Independent Array Technology, Affymetrix 2.7M**

- A) **Visual validation of all reported CNV loci using Illumina Quad 610 Intensity Data.** Results from visual inspections are provided. Gray rectangle represents normal diploid two copy state.
- B) **Representative experimental validation of two of most significant deletions and two duplications, using Affymetrix 2.7M intensity data at a high**

**resolution.** Intensity values are plotted for each region listed based on samples with copy number variation calls.

- C) **Experimental validation of all Table 2 loci using Affymetrix 2.7M intensity data.** Intensity values are plotted for each region listed based on samples with copy number variation calls. Table 2 loci are labeled with corresponding intensity values for contiguous probes in the genomic region.

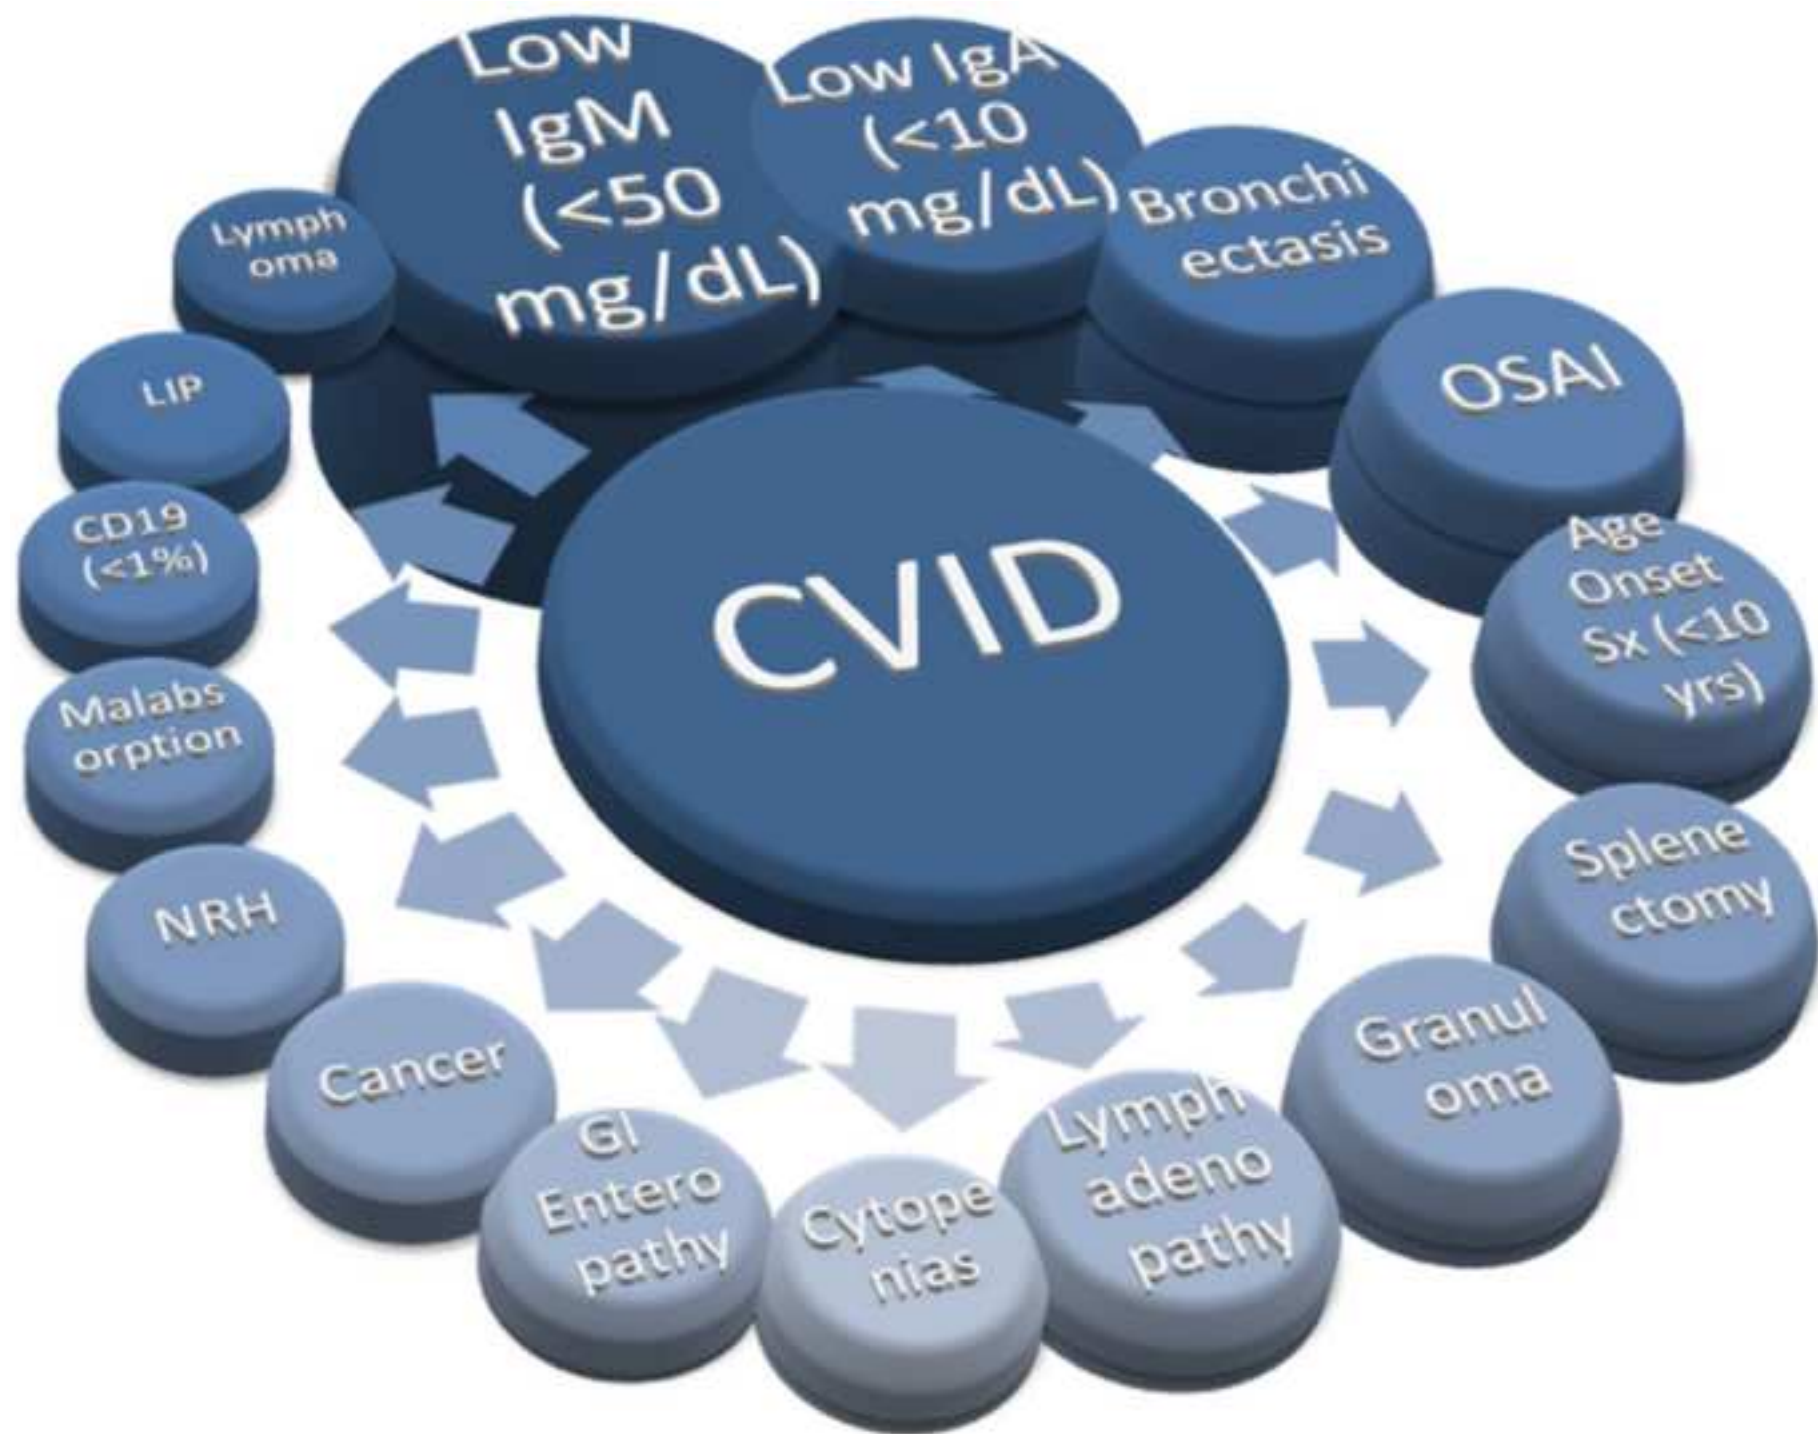



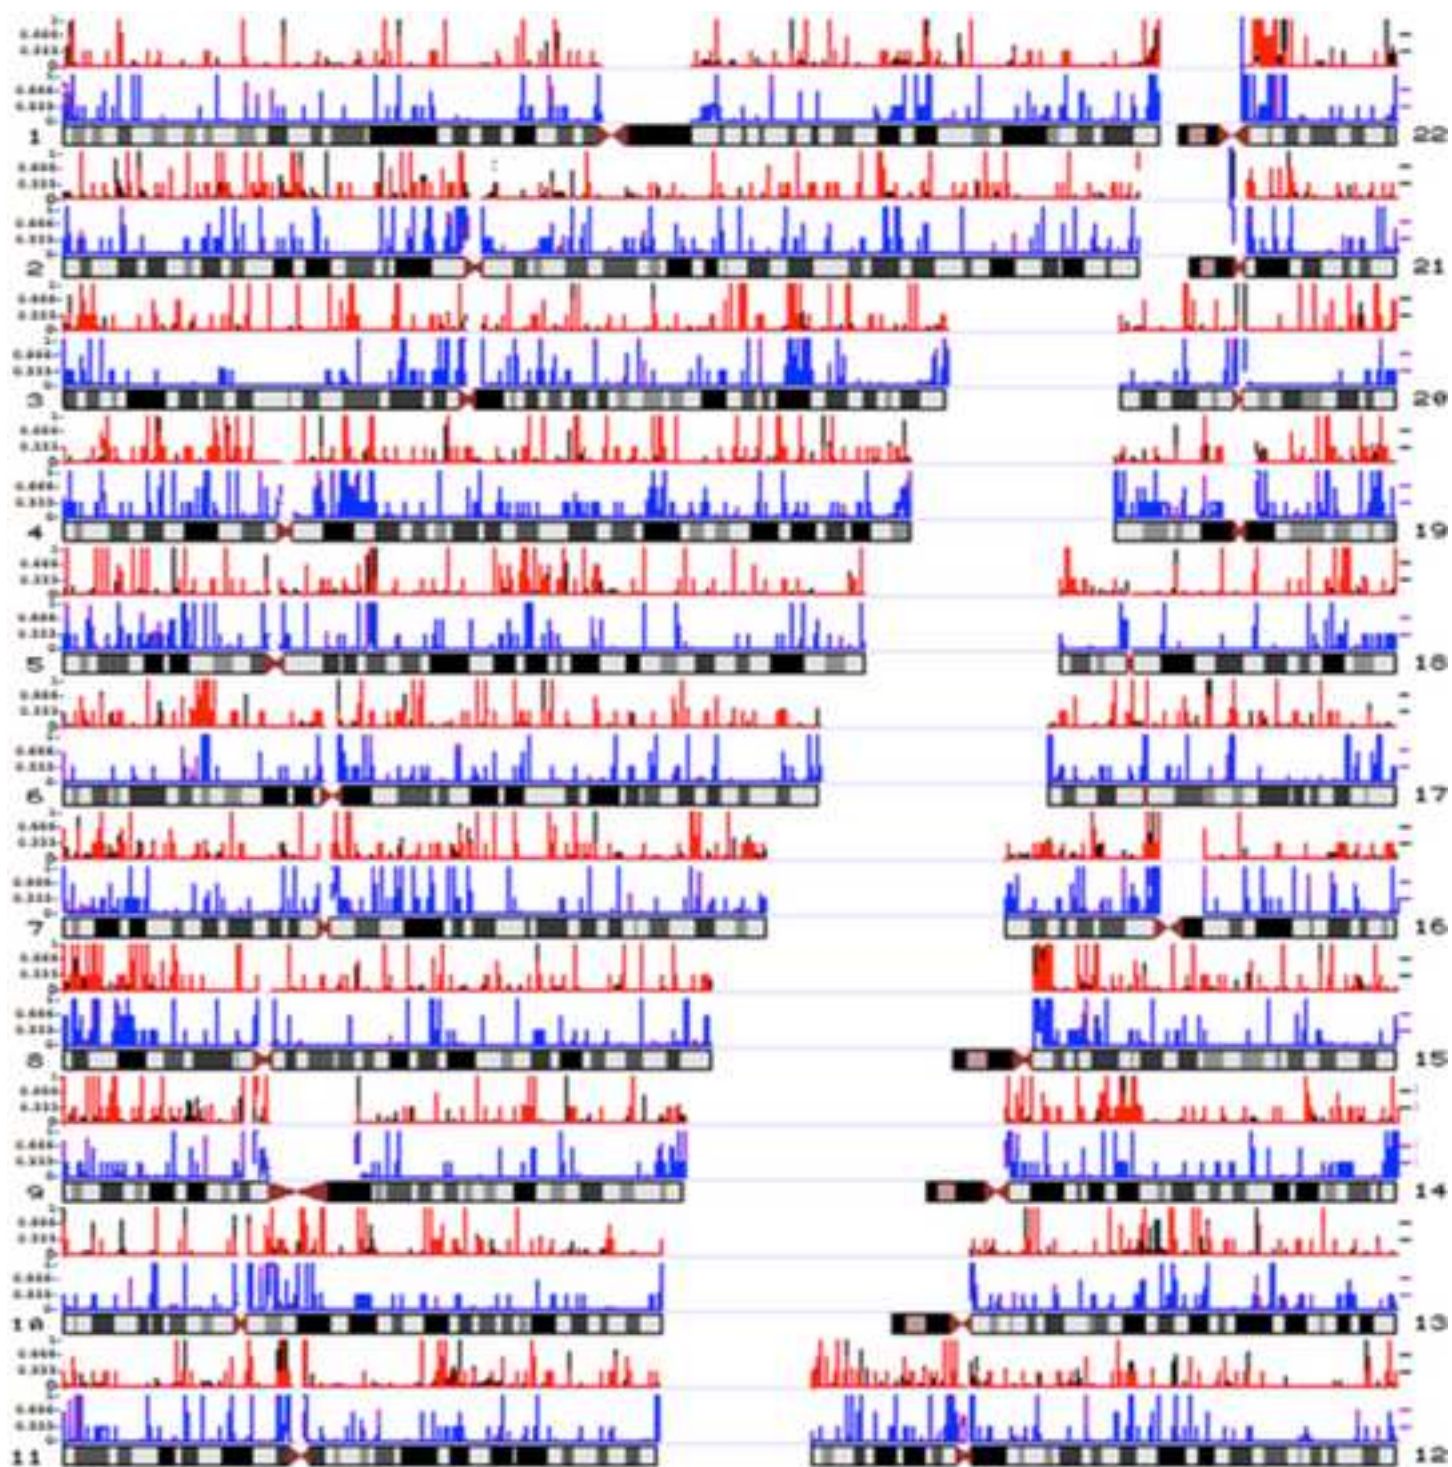

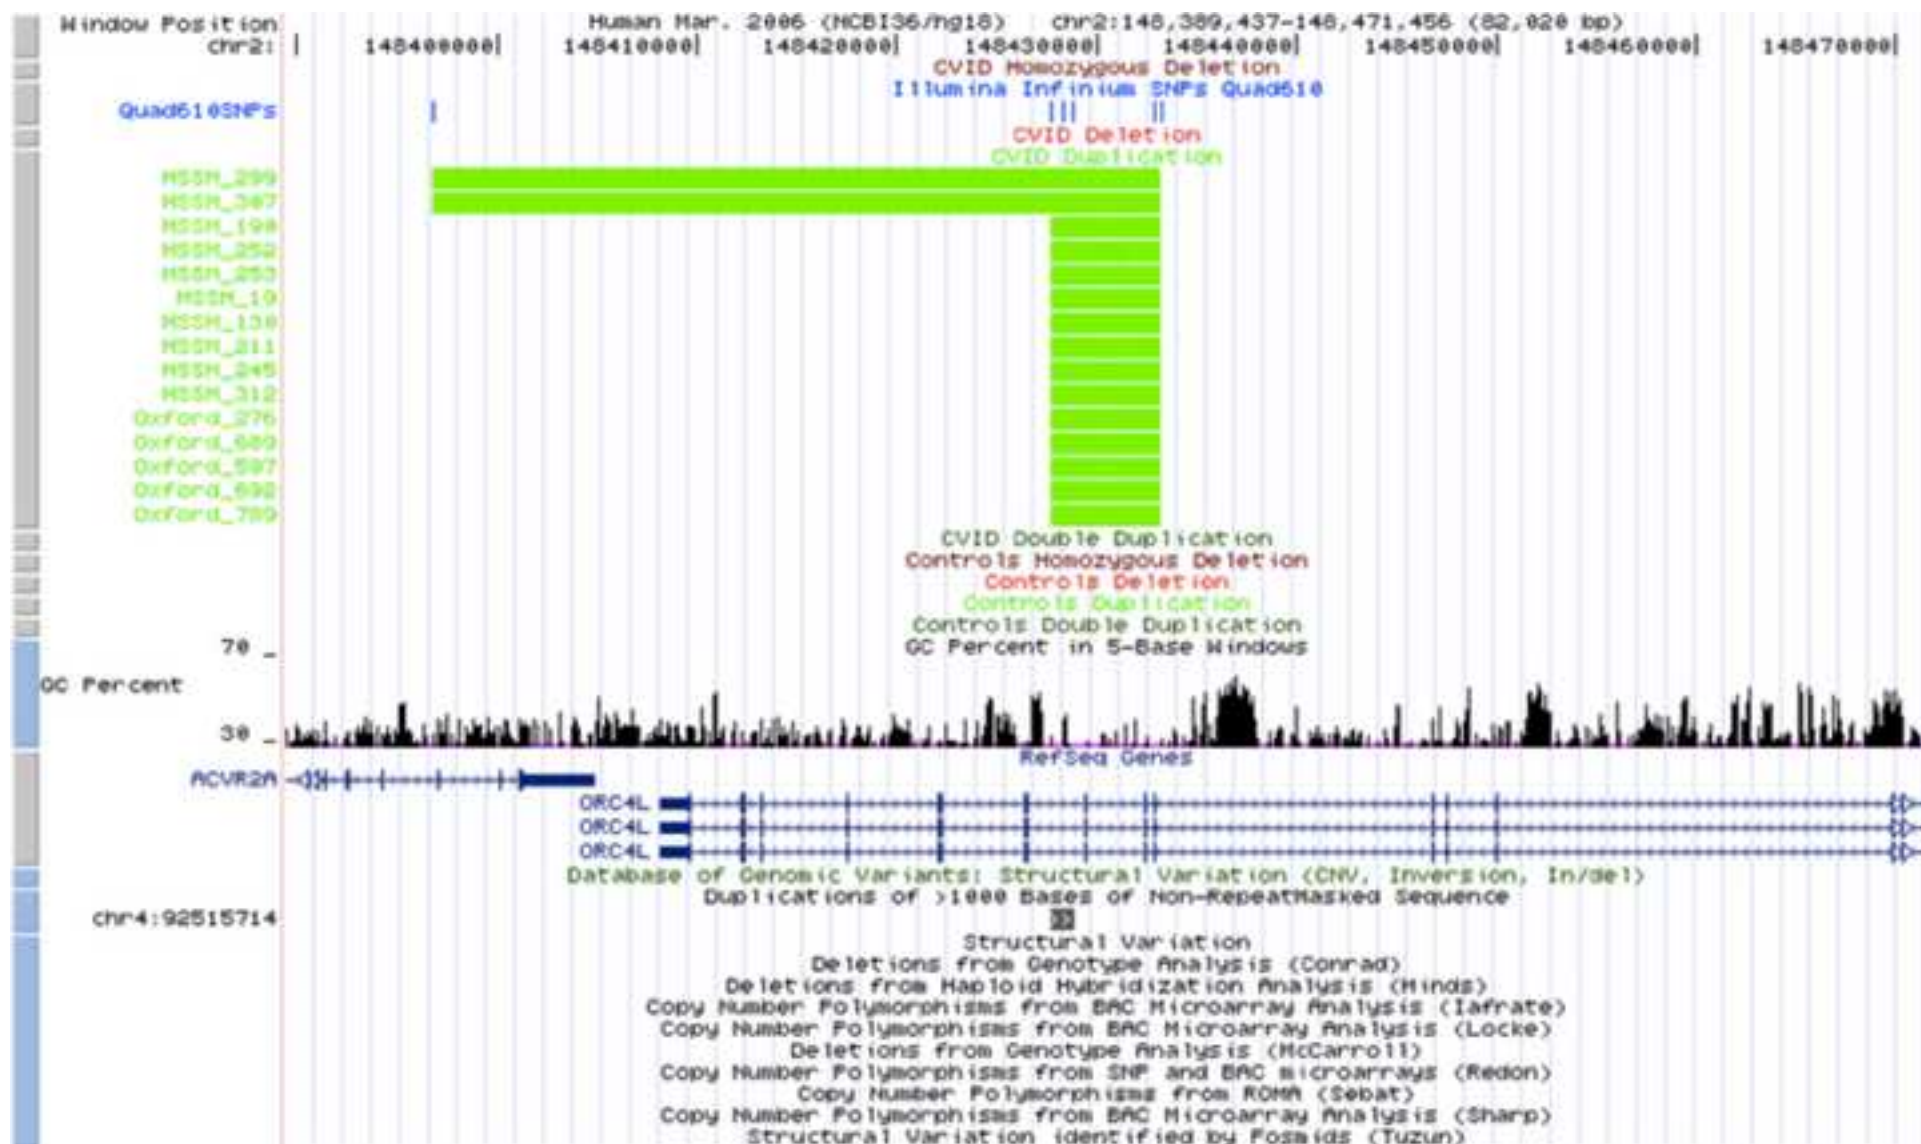





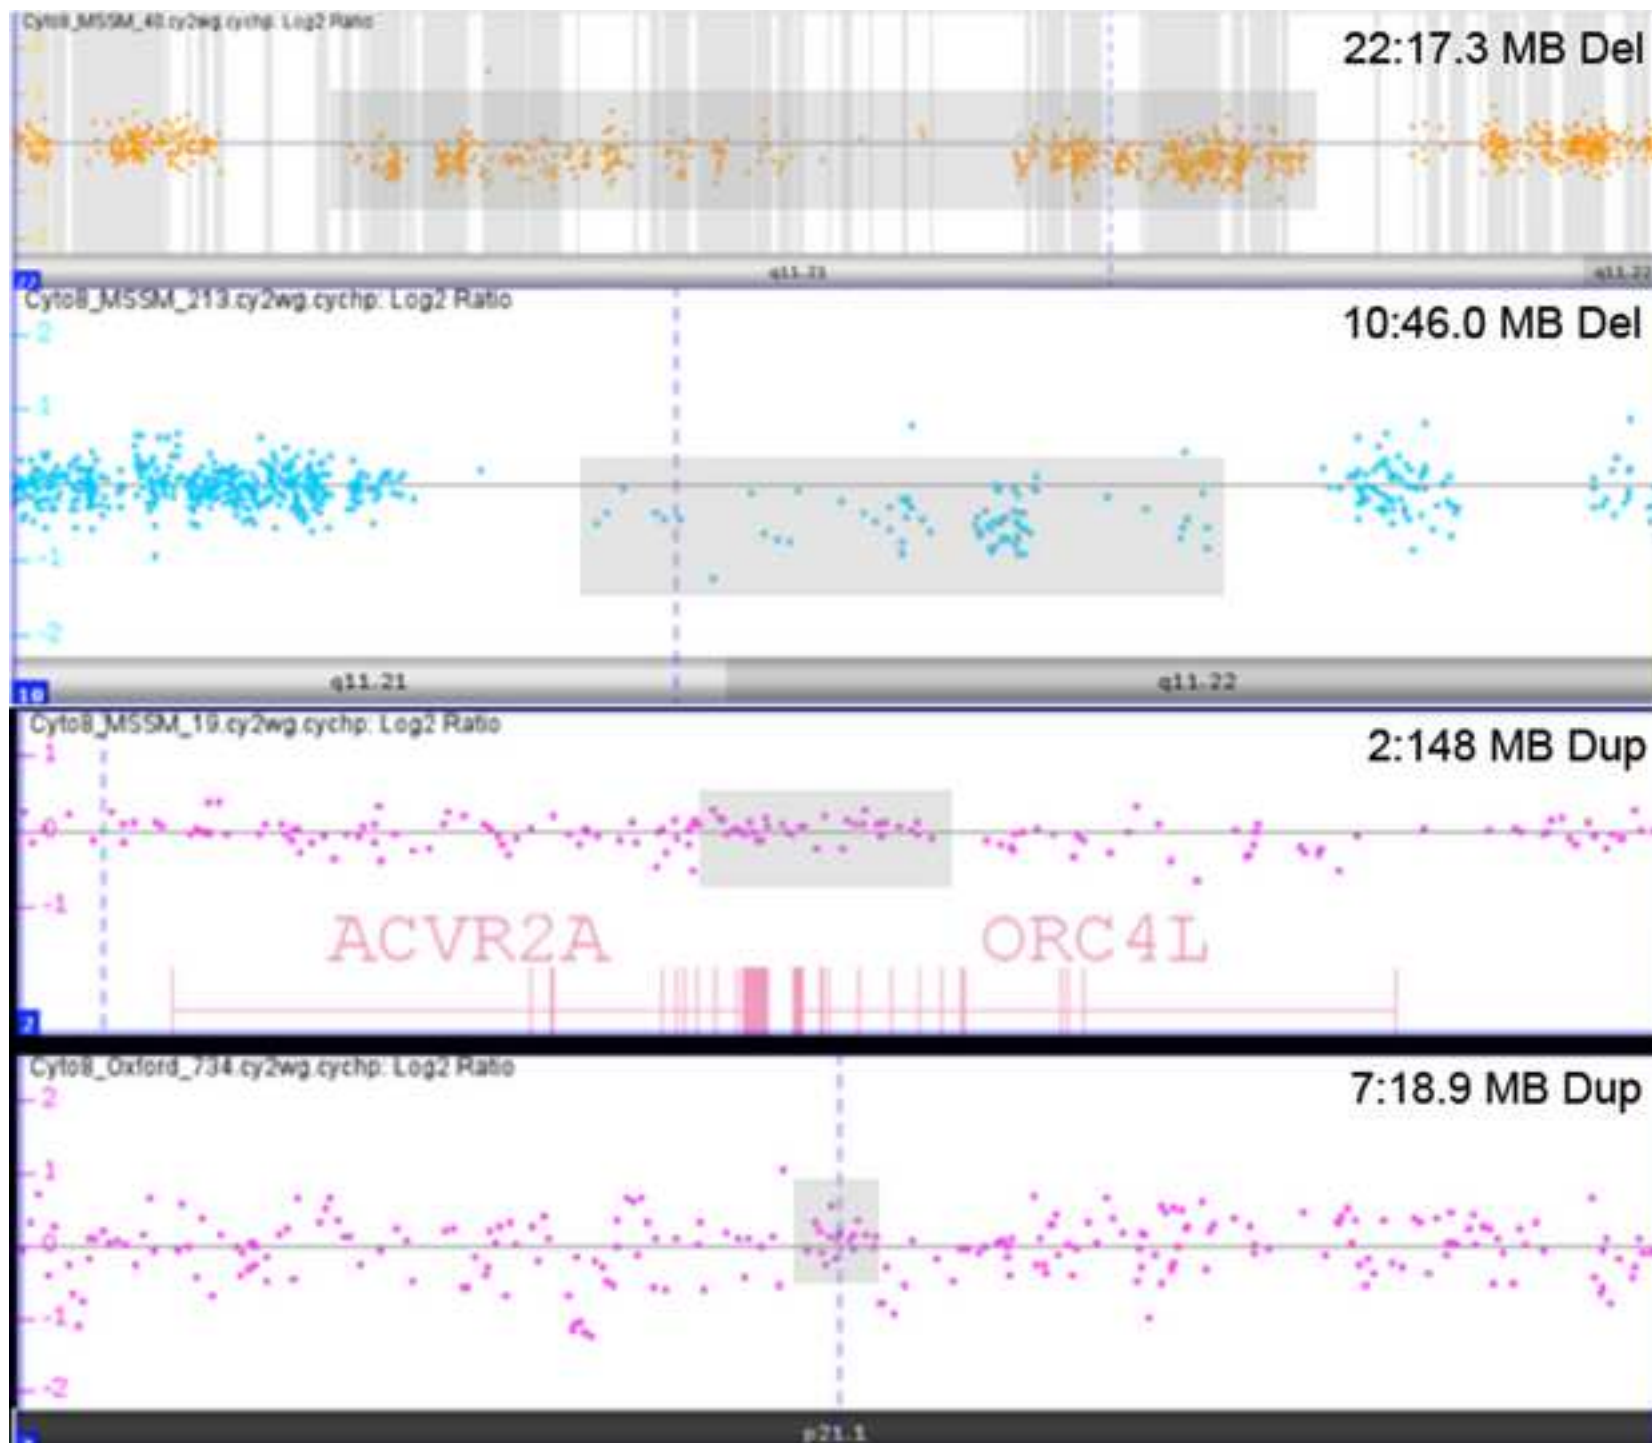

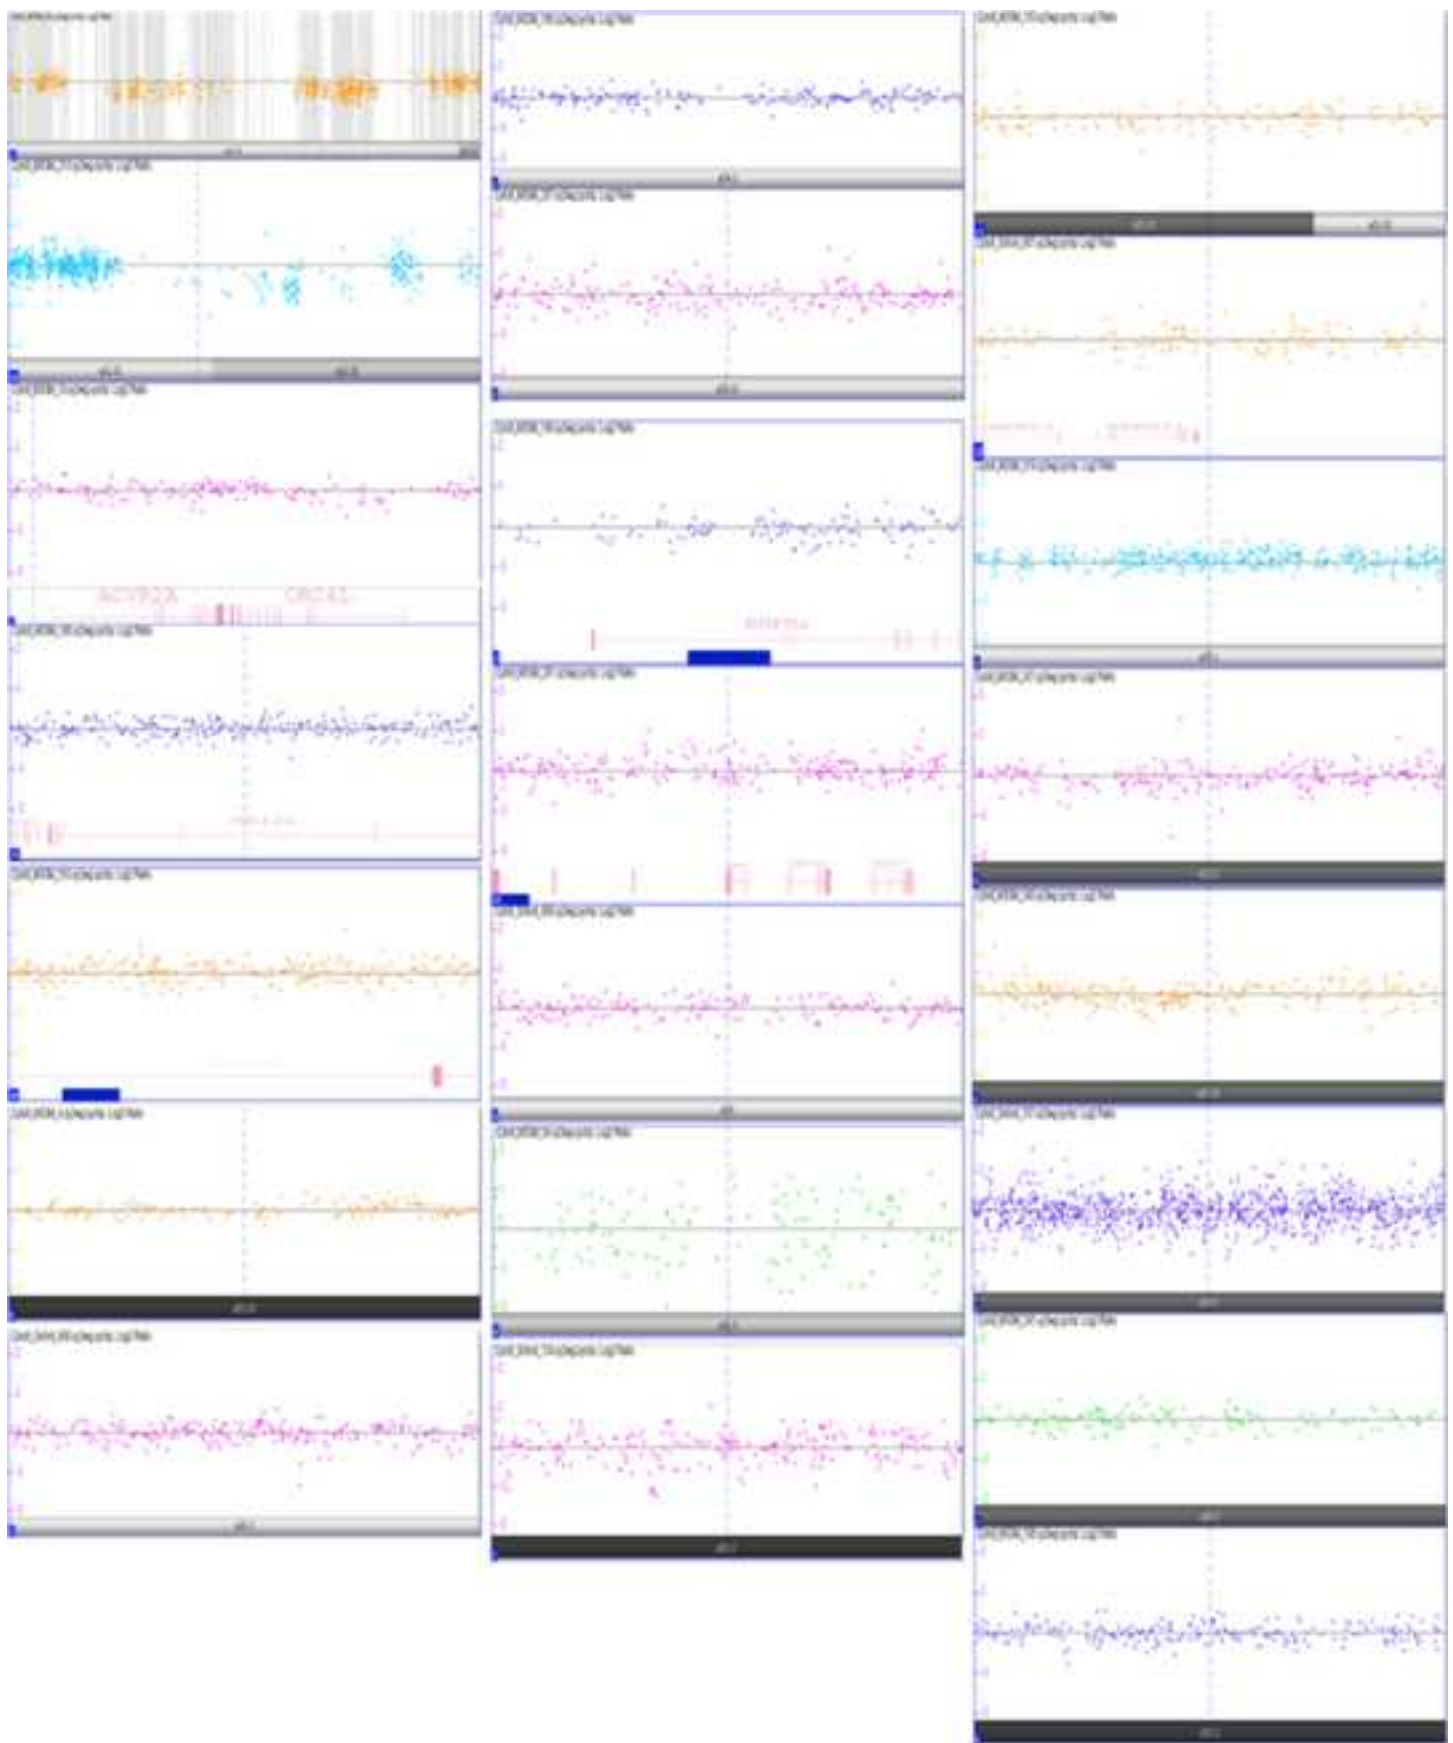

Supplement: NIHMS281974-supplement-01.pdf [file NIHMS281974-supplement-01.pdf]
